# Supplementary material
Source: ML conference proceedings conference paper supplement (https://openreview.net/forum?id=b-cto-fetlz)
Supplement: supplementary_material [file attachment]

# HomeRobot: Open-Vocabulary Mobile Manipulation

Anonymous Author(s)

Affiliation

Address

email

**Abstract:** HomeRobot  (*noun*): An affordable compliant robot that navigates homes and manipulates a wide range of objects in order to complete everyday tasks.

Open-Vocabulary Mobile Manipulation (OVMM) is the problem of picking *any* object in *any* unseen environment, and placing it in a commanded location. This is a foundational challenge for robots to be useful assistants in human environments, because it involves tackling sub-problems from across robotics: perception, language understanding, navigation, and manipulation are all essential to OVMM. In addition, integration of the solutions to these sub-problems poses its own substantial challenges. To drive research in this area, we introduce the HomeRobot OVMM benchmark, where an agent navigates household environments to grasp novel objects and place them on target receptacles. HomeRobot has two components: a *simulation* component, which uses a large and diverse curated object set in new, high-quality multi-room home environments; and a *real-world* component, providing a software stack for the low-cost Hello Robot Stretch to encourage replication of real-world experiments across labs. We implement both reinforcement learning and heuristic (model-based) baselines and show evidence of sim-to-real transfer. Our baselines achieve a 20% success rate in the real world; our experiments identify ways future research work improve performance. See videos on our website: <https://home-robot-ovmm.github.io/>.

**Keywords:** Sim-to-real, benchmarking robot learning, mobile manipulation

## 1 Introduction

The aspiration to develop household robotic assistants has served as a north star for roboticists since the beginning of the field. The pursuit of this vision has spawned multiple areas of research within robotics from vision to manipulation, and has led to increasingly complex tasks and benchmarks. A useful household assistant requires creating a capable mobile manipulator that understands a wide variety of objects, how to interact with the environment, and how to intelligently explore a world with limited sensing. This has separately motivated research in diverse areas like navigation [1, 2], service robotics [3–5], language understanding [6, 7] and task and motion planning [8]. We refer to this guiding problem as *Open-Vocabulary Mobile Manipulation (OVMM)*: a useful robot will be able to find and move arbitrary objects from place to place in an arbitrary home.

Prior work does not tackle mobile manipulation in large, continuous, real-world environments. Instead, it generally simplifies the setting significantly, e.g. by using discrete action spaces, limited object sets, or small, single-room environments that are easily explored. However, recent developments tying language and vision have enabled robots to generalize beyond specific categories [9–13], often through multi-modal models such as CLIP [14]. Further, comparison across methods has remained difficult and reproduction of results across labs impossible, since many aspects of the settings (environments, and robots) have not been standardized. This is especially important now, as a new wave of research projects have begun to show promising results in complex, open-vocabulary

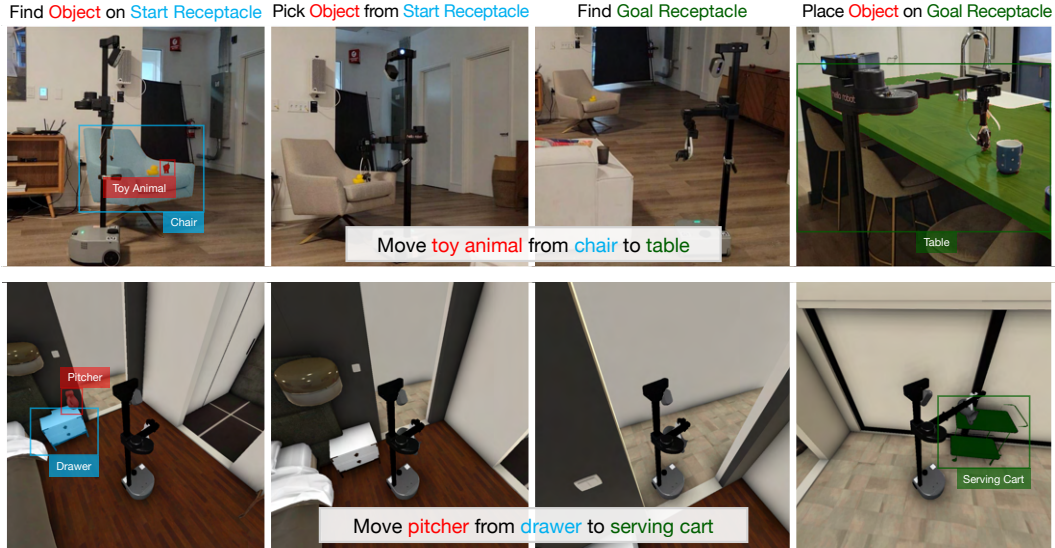

Figure 1: Open-Vocabulary Mobile Manipulation requires agents to search for a previously unseen object at a particular location, and move it to the correct receptacle.

navigation [9, 15, 11, 12, 16] and manipulation [17, 10, 18] – again on a wide range of robots and settings, and still limited to single-room environments. Clearly, now is the time when we need a common platform and benchmarks to drive the field forward.

In this work, we define Open-Vocabulary Mobile Manipulation as a key task for in-home robotics and provide benchmarks and infrastructure, both in simulation and the real world, to build and evaluate full-stack integrated mobile manipulation systems, in a wide variety of human-centric environments, with open object sets. Our benchmark will further reproducible research in this setting, and the fact that we support arbitrary objects will enable the results to be deployed in a variety of real-world environments.

**OVMM:** We propose the first reproducible mobile-manipulation benchmark for the real world, with an associated simulation component. In simulation, we use a dataset of 200 human-authored interactive 3D scenes [19] instantiated in the AI Habitat simulator [20, 21] to create a large number of challenging, multi-room OVMM problems with a wide variety of objects curated from a variety of sources. Some of these objects’ categories have been seen during training; others have not. In the real world, we create an equivalent benchmark, also with a mix of seen and unseen object categories, in a controlled apartment environment. We use the Hello Robot Stretch [22]: an affordable and compliant platform for household and social robotics that is already in use at over 40 universities and industry research labs. Fig. 1 shows instantiations of our OVMM task in both the real-world benchmark and in simulation. We have a controlled real-world test environment, and plan to run the real world benchmark yearly to assess progress on this challenging problem.

**HomeRobot:** We also propose HomeRobot,<sup>1</sup> a software framework to facilitate extensive benchmarking in both simulated and physical environments. It comprises identical APIs that are implemented across both settings, enabling researchers to conduct experiments that can be replicated in both simulated and real-world environments. Table 1 compares OVMM+HomeRobot to the literature.

In this paper, we use HomeRobot to compare two families of approaches: a *heuristic* solution, using a motion planner shown to work for real-world object search [2], and a *reinforcement learning* (RL) solution, which learns how to navigate to objects given depth and predicted object segmentation. We use the open-vocabulary object detector DETIC [23] to provide object segmentation for both the heuristic and RL policies. We observe that while the RL methods moved to the object more efficiently if an object was visible, the heuristic planner was better at long-horizon exploration. We also see

<sup>1</sup>Code will be released at the time of final submission.

|                                                                                                           | Scenes | Object |       | Continuous<br>Actions | Sim2Real | Robotics<br>Stack | Open<br>Licensing | Manipulation |
|-----------------------------------------------------------------------------------------------------------|--------|--------|-------|-----------------------|----------|-------------------|-------------------|--------------|
|                                                                                                           |        | Cats   | Inst. |                       |          |                   |                   |              |
| Room Rearrangement [24]                                                                                   | 120    | 118    | 118   | ✗                     | ✗        | ✗                 | ✓                 | ✗            |
| Habitat ObjectNav Challenge [25]                                                                          | 216    | 6      | 7,599 | ✓                     | ✗        | ✗                 | ✓                 | ✗            |
| TDW-Transport [26]                                                                                        | 15     | 50     | 112   | ✗                     | ✗        | ✗                 | ✓                 | ✓            |
| VirtualHome [27]                                                                                          | 6      | 308    | 1,066 | ✗                     | ✗        | ✗                 | ✓                 | ✓            |
| ALFRED [6]                                                                                                | 120    | 84     | 84    | ✗                     | ✗        | ✗                 | ✓                 | ✓            |
| Habitat 2.0 HAB [21]                                                                                      | 105    | 20     | 20    | ✓                     | ✗        | ✗                 | ✓                 | ✓            |
| ProcTHOR [28]                                                                                             | 10,000 | 108    | 1,633 | ✗                     | ✗        | ✗                 | ✓                 | ✓            |
| RoboTHOR [29]                                                                                             | 75     | 43     | 731   | ✗                     | ✓        | ✗                 | ✓                 | ✗            |
| Behavior-1K [30]                                                                                          | 50     | 1,265  | 5,215 | ✓                     | ✓        | ✗                 | ✗                 | ✓            |
| ManiSkill-2 [31]                                                                                          | 1      | 2,000  | 2,000 | ✓                     | ✓        | ✗                 | ✓                 | ✓            |
|  <b>OVMM + HomeRobot</b> | 200    | 150    | 7,892 | ✓                     | ✓        | ✓                 | ✓                 | ✓            |

Table 1: Comparisons of our proposed benchmark with prior work. We provide a large number of environments with a continuous action space, and uniquely provide a real-world robotics stack with demonstrated sim-to-real capabilities, allowing others to reproduce and deploy their own solutions. Additional nuances in footnote<sup>3</sup>. ✓Partial availability ✗Not available ✓Capability available

a substantial drop in performance in switching from from ground-truth segmentation to DETIC segmentation. This highlights the importance of the OVMM challenge, as only through viewing the problem holistically - integrating perception, planning, and action - can we build general-purpose home assistants.

To summarize, in this paper, we define Open-Vocabulary Mobile Manipulation as a new, crucial task for the robotics community in Sec. 3. We provide a new simulation environment, with multiple, multi-room interactive environments and a wide range of objects. We implement a robotics library called HomeRobot which provides baseline policies implementing this in both the simulation and the real world. We describe a real-world benchmark in a controlled environment, and show how current baselines perform in simulation and in the real world under different conditions.

## 2 Related Work

We discuss work related to challenges and reproducibility of robotics research in more detail, but continue the discussion of datasets and simulators in Appendix A.

**Challenges.** There have been several challenges aiming to benchmark robotic systems at different tasks. These challenges provided a great testbed for ranking different systems. However, in most of the challenges (e.g., [32–35, 3]), the participants create their own robotic platform making a fair comparison of the algorithms difficult. There are also challenges where the organizers provide the robotic platform to the participants (e.g., [36]). However, changing the task during the periodic evaluations made it difficult to track progress over time. Our aim is to have a real world benchmark using a standard hardware that is sustainable at least for a few years.

**Reproducibility of robotics research.** Standardized robotics benchmarks have been pursued for a long time, often by open-sourcing robot designs or introducing low-cost robots [37–45]. However, the environments in which these robots are used vary dramatically, leading to evaluation of components (e.g., object navigation, SLAM) in isolation, instead of as components of a larger system that may not benefit from those changes. The HomeRobot stack enables end-to-end benchmarking of individual components by providing a full robotics stack, with multiple implementations of different sub-modules. The simplicity helps move beyond standardized sets of objects (e.g., [46–48]) to a common set of robots, objects, and environments.

**Real-World Benchmarks.** RoboTHOR [29] provides a common set of scenes and objects for benchmarking navigation. RB2 [49] ranks different manipulation algorithms in a local setting. TOTO [50] takes a step further by providing a training dataset and running the experiments for

<sup>3</sup>ALFRED uses object masks for interaction. ObjectNav uses scans, not full object meshes. ProcThor scenes are procedurally generated, this has the benefit that the potential number of environments is unbounded.

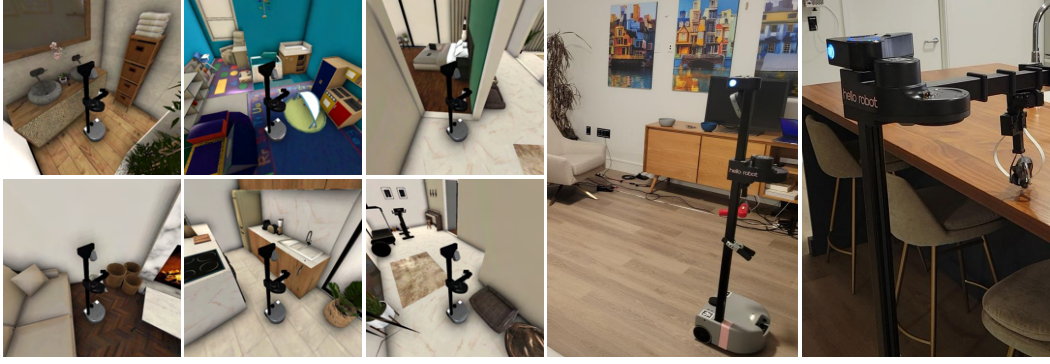

Figure 2: A low-cost home robot performing tasks in both a simulated and a real-world environment. We provide both (1) challenging simulated tasks, wherein a mobile manipulator robot must find and grasp multiple seen and unseen objects, and (2) a corresponding real-world robotics stack to allow others to reproduce this research and evaluation to produce useful home robot assistants.

the users. However, training and testing happen in the same environments and are limited to tabletop manipulation. Finally, the NIST Task Board [51] is a successful challenge for fine-grained manipulation skills [52], also limited to a tabletop context. Kadian et al. [53] propose the Habitat-PyRobot bridge (HaPy) to allow real-world testing on the locobot robot; their framework is limited to navigation, and doesn’t provide a generally-useful robotics stack with visualizations, debugging, motion planners, tooling, etc.

### 3 Open-Vocabulary Mobile Manipulation

Formally, our task is set up as instructions of the form: “Move (object) from the (start\_receptacle) to the (goal\_receptacle).” The object is a small and manipulable household object (e.g., a cup, stuffed toy, or box). By contrast, `start_receptacle` and `goal_receptacle` are large pieces of furniture, which have surfaces upon which objects can be placed. The robot is placed in an unknown single-floor home environment - such as an apartment - and must, given the language names of `start_receptacle`, `object`, and `goal_receptacle`, pick up an object that is known to be on a `start_receptacle` and move it to any valid `goal_receptacle`. `start_receptacle` is always available, to help agents know where to look for the object.

The agent is successful if the specified object is indeed moved from a `start_receptacle` on which it began the episode, to any valid `goal_receptacle`. We give partial credit for each step the robot accomplishes: finding the `start_receptacle` with the object, picking up the object, finding the `goal_receptacle`, and placing the object on the `goal_receptacle`. There can be multiple valid objects that satisfy each query.

Crucially, we need and develop both (1) a simulation version of this OVMM problem, for reproducibility, training, and fast iteration, and (2) a real-robot stack with a corresponding real-world benchmark. We compare the two in Fig. 2. Our simulated environments allow for varied, long-horizon task experimentation; our real-world HomeRobot stack allows for experimenting with real data, and we design a set of real-world tests to evaluate the performance of our learned and heuristic baselines.

**The Robot.** We use the Hello Robot Stretch [22] with DexWrist as the mobile manipulation platform, because it (1) is *relatively* affordable at \$25,000 USD, (2) offers 6 DoF manipulation, and (3) is human safe and human-sized, making it safe to test in labs [54, 11] and homes [2], and can reach most places a human would expect a robot to go. For a breakdown on hardware choices, see Sec. G.1.

**Objects.** These are split into *seen* vs. *unseen categories* and *instances*. In particular, at test time we look at unseen instances of seen or unseen categories; i.e. no seen manipulable object from training appears during evaluation. Agents must pick and place any requested object.



**Receptacles.** We include common household receptacles (e.g. tables, chairs, sofas) in our dataset; unlike with manipulable objects, all possible receptacle categories are seen during training.

**Scenes.** We have both a simulated scene dataset, and a fixed set of real-world scenes with specific furniture arrangements and objects. In both simulated and real scenes, we use a mixture of objects from *previously-seen* categories, and objects from *unseen* categories as the goal object for our Open-Vocabulary Mobile Manipulation task. We hold out *validation* and *test* scenes, which do not appear in the training data; while some receptacles may re-appear, they will be at previously-unseen locations, and target object instances will be unseen.

**Scoring.** We compute success for each stage: finding object on `start_receptacle`, successfully picking up object, finding `goal_receptacle`, and placing object on the goal. Overall success is true if all four stages were accomplished. We also compute a single *partial success* metric as a tie-breaker, in which agents receive 1 point for each successive stage accomplished per episode, normalized by the number of stages. More details in Appendix B.

### 3.1 Simulation Dataset

The Habitat Synthetic Scenes Dataset (HSSD) [19] consists of 200+ human authored 3D home scenes containing over 18k individual models of real-world objects. Like most real houses, these scenes are cluttered with furniture and other objects placed into realistic architectural layouts, making navigation and manipulation similarly difficult to the real world. We used a subset of HSSD [19] consisting of 60 scenes (e.g. Fig. 3) for which additional metadata and simulation structures were authored to support rearrangement<sup>4</sup>. For our experiments these are divided into train, validation, and test splits of 38, 12, and 10 scenes each, following the splits in the original HSSD paper [19].

**Objects and Receptacles.** We aggregate objects from AI2-Thor [55], Amazon-Berkeley Objects [56], Google Scanned Objects [57] and the HSSD [19] dataset to create a large and diverse dataset of real-world robot problems. In total, we annotated 2,535 objects from 129 total categories. We identified 21 different categories of receptacle which appear in the HSSD dataset [19].

We construct our final set of furniture receptacle objects by first automatically labeling stable areas on top of receptacles, then manually refining and processing these in order to remove invalid or inaccessible receptacles. In addition, collision proxy meshes were automatically generated and in many cases manually corrected to support physically accurate procedural placement of object arrangements.

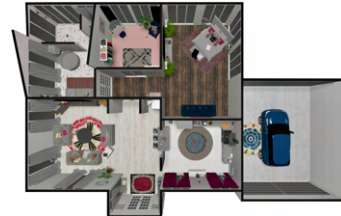

Figure 3: Example (object free) top-down view from HSSD [19]. See App. Figs. 7 & 9 for navigation and viewpoints.

**Episode Generation.** We generate episodes consisting of varying object arrangements and particular values for `object`, `start_receptacle`, and `goal_receptacle`, which allow our agent to successfully move about and interact with the world. In the case of Open-Vocabulary Mobile Manipulation, this task is particularly challenging because we have to place objects in locations which are *navigable*, meaning that the robot can get to them, *reachable*, meaning its arm can make it to these locations, and from which we can navigate to a *navigable, reachable* goal receptacle. For full episode generation details see App. C.2.

**Training and Validation Split.** Training episodes consist of objects from the large pool of seen instances of seen categories (*SC, SI*). In contrast, we use unseen instances of seen object categories (*SC, UI*) and unseen instances of unseen categories (*UC, UI*) for validation and test episodes. Two-thirds of the categories were randomly designated as seen, and two-thirds of the objects in the seen category were randomly marked as seen instances. Split sizes are in Table 2 and the distribution of objects across categories is in App. Fig. 5.

|       | SC, SI | SC, UI | UC, UI | Total |
|-------|--------|--------|--------|-------|
| Cats  | 85     | 64     | 44     | 129   |
| Insts | 1,363  | 748    | 424    | 2,535 |

Table 2: # of objects in each split: (S)een, (U)nseen, (I)nstance, and (C)ategory in simulation.

<sup>4</sup>All 200+ scenes with rearrangement support will be released at the time of final submission.

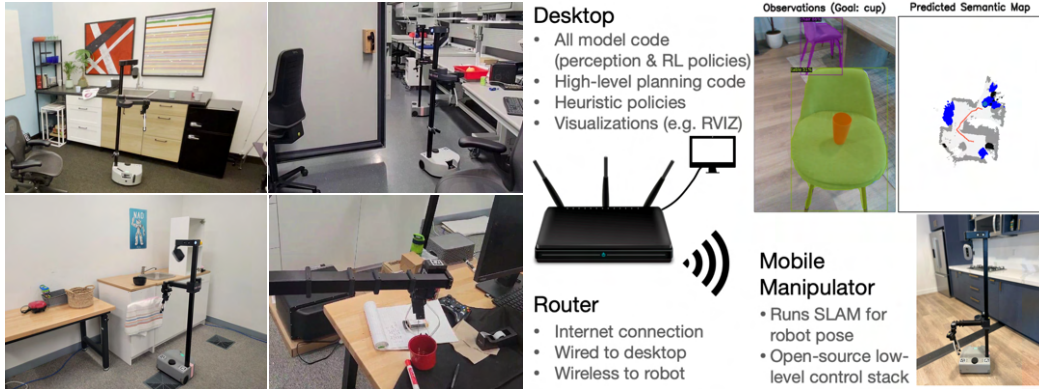

Figure 4: HomeRobot is a simple, easy-to-set-up library which works in multiple environments and requires only relatively affordable hardware. Computationally intensive operations are performed on a desktop PC with a GPU, and a dedicated consumer-grade router provides a network interface to a robot running low-level control and SLAM.

### 3.2 Real-World Benchmark

Real-world experiments are performed in a controlled 3-room apartment environment, with a sofa, kitchen table, counter with bar, and TV stand, among other features. We documented the positioning of various objects and the robot start position, in order to ensure reproducibility across trials. Images of various layouts of the test apartment are included in Fig. 2, and task execution is shown in Fig. 13.

During real-world testing, we selected a pool of object instances that did not appear during simulation training, but split between classes that did and did not appear in training. We used eight different categories, of which five were seen during training (*Cup*, *Bowl*, *Stuffed Toy*, *Medicine Bottle*, and *Toy Animal*), and three were not (*Rubik’s cube*, *Toy Drill*, and *Lemon*). We performed 20 experiments on the Stretch robot for each of our two different baselines and with seven different receptacle classes: *Cabinet*, *Chair*, *Couch*, *Counter*, *Sink*, *Stool*, *Table*.

## 4 The HomeRobot Library

To facilitate research on these challenging problems, we open-source the HomeRobot library, which implements navigation and manipulation capabilities supporting Hello Robot’s Stretch [22]. In our setup, it is assumed that users have access to a mobile manipulator and a NVIDIA GPU powered workstation. The mobile manipulator runs the low-level controller and the localization module, while the desktop runs the high-level perception and planning stack (Fig. 4). The robot and desktop are connected using an off-the-shelf router<sup>5</sup>. HomeRobot is designed as a user-friendly software stack, enabling quick setup of the robot for immediate testing. The key features of our stack include:

**Transferability:** Unified state and action spaces between simulation & real-world settings for each task, providing an easy way to control a robot with either high-level action spaces (e.g., pre-made grasping policies) or low-level continuous joint control.

**Modularity:** Perception and action components to support high-level states (e.g. semantic maps, segmented point clouds) and high-level actions (e.g. go to goal position, pick up target object).

**Baseline Agents:** Policies that use these capabilities to provide basic functionality for OVMM.

### 4.1 Baseline Agent Implementation

Crucially, we provide baselines and tools that enable researchers to effectively explore the Open-Vocabulary Mobile Manipulation task. We include two types of baselines in HomeRobot: a heuristic baseline, in which we use a well known motion planning technique [2] and simple rules to execute grasping and manipulation actions; and a reinforcement learning baseline, where we learn exploration

<sup>5</sup>Our experiments used a NetGear Nighthawk router.

| Simulation Results | Skill      |      |           | Partial Success Rates |      |         | Overall Success Rate | Partial Success Metric |
|--------------------|------------|------|-----------|-----------------------|------|---------|----------------------|------------------------|
|                    | Navigation | Gaze | Place     | FindObj               | Pick | FindRec |                      |                        |
| Ground Truth       | Heuristic  | None | Heuristic | 46.2                  | 39.5 | 18.6    | 6.9                  | 27.3                   |
|                    | Heuristic  | RL   | RL        | 47.2                  | 41.7 | 27.1    | 19.7                 | 32.5                   |
|                    | RL         | None | Heuristic | 55.1                  | 41.9 | 26.4    | 6.5                  | 32.2                   |
|                    | RL         | RL   | RL        | 55.7                  | 50.2 | 35.2    | 21.0                 | 39.8                   |
| DETIC [23]         | Heuristic  | None | Heuristic | 23.3                  | 11.5 | 3.0     | 0.3                  | 9.5                    |
|                    | Heuristic  | RL   | RL        | 24.8                  | 9.5  | 5.0     | 0.7                  | 10.0                   |
|                    | RL         | None | Heuristic | 19.9                  | 10.2 | 4.4     | 0.8                  | 8.8                    |
|                    | RL         | RL   | RL        | 19.8                  | 11.8 | 6.3     | 1.5                  | 9.8                    |

Table 3: We observe that one of the main causes of failures for our baseline systems was perception failures; ground-truth performance is notably higher. We also see that both RL and heuristic skills struggled navigating tightly constrained multi-room environments and successfully placing objects.

and manipulation skills using an off-the-self policy learning algorithm, DDPPPO [58]. Due to the challenging, long-horizon nature of the task, we implement a high-level policy called OVMMAgent which calls a sequence of skills to accomplish a task. We breakdown our agents into four skills:

**FindObj/FindRec:** Locate an object on a `start_receptacle`; or find a `goal_receptacle`.

**Gaze:** Move close enough to an object to grasp it, and orient head to get a good view of the object. The goal of the gaze action is to improve the success rate of grasping.

**Grasp:** Pick up the object. We provide a high-level action for this, since we do not simulate the gripper interaction in Habitat. However, our library is compatible with a range of learned grasping skills and supports learning policies for grasping.

**Place:** Move to a location in the environment and place the object on top of the `goal_receptacle`.

**Heuristic.** We implement a version using only off-the-shelf learned models and heuristics, noting that previous work in mobile manipulation has used these models to great effect (e.g. [59]). Here, DETIC [60] provides masks for an open-vocabulary set of objects as appropriate for each skill. The `start_receptacle`, `object`, `goal_receptacle` for each episode is given. Fig. 13 shows an example of the heuristic navigation and place policy being executed in the real world (App. D).

**RL.** We train the four skills in our modified version of Habitat [21] as policies which predict actions given depth, ground truth semantic segmentation and proprioceptive sensors (i.e. joints, gripper state), using DDPPPO [58]. While RGB is available in our simulation, our baseline policies do not directly utilize it; instead, they rely on predicted segmentation from Detic [23] at test time.

## 5 Results

We first evaluate the two baselines in our simulated benchmark, followed by evaluation in a real-world, held-out test apartment. These results highlight the significance of OVMM as a challenging new benchmark, encompassing numerous essential challenges that arise when deploying robots in real-world environments.

We break down the results by sub-task in addition to reporting the overall performance in Tables 3 and 4. The columns **FindObj**, **Pick** and **FindRec** refer to the first 3 phases of the task mentioned in the scoring section (Sec. 3), and succeeding in the final Place phase leads to a successful episode.

**Simulation.** We evaluate the baselines on held-out scenes, with objects from unseen instances of seen classes, and unseen instances of *unseen* classes, as described in Sec. 3.1. We show results with two different perception systems: **Ground Truth** segmentation, where we use the segmentation input directly from the simulator, and **DETIC** segmentation [23], where the RGB images from the simulator are passed through DETIC, an open-vocabulary object detector.

We report results in Table 3 broken down by skill. The results show that RL policies outperformed heuristic methods for both navigation and placement tasks. However, all policies experienced a decline in performance when the perception is changed from ground truth to DETIC. Notably, heuristic policies exhibited less degradation in performance compared to RL policies under DETIC

| <b>Real World</b> | FindObj | Pick | FindRec | Overall Success |
|-------------------|---------|------|---------|-----------------|
| Heuristic Only    | 0.70    | 0.35 | 0.30    | 0.15            |
| RL Only           | 0.70    | 0.45 | 0.30    | 0.20            |

Table 4: Results for heuristic and RL baseline in the real world on the OVMM task. In both cases, the grasping action is executed as described in Sec. 4; but initial conditions of the robot such as its position relative to the object or to other obstacles may cause various failures.

perception. With DETIC perception, the heuristic FindObj policy outperforms RL. We attribute this to the heuristic policy’s ability to incorporate noisy predictions by constructing a 2D semantic map, which proves advantageous in handling small objects that are prone to misclassification. Furthermore, we observed that the learned gaze policy generally led to improved pick performance, except when used in combination with the Heuristic nav with DETIC perception. For additional information, example simulation trajectories can be found in Appendix Figure 15, and results comparing seen versus unseen categories are discussed in Appendix F.2.

**Real-World.** Finally, we conducted a series of experiments in a real-world held-out apartment setting. We performed a total of 20 episodes, utilizing a combination of seen and unseen object classes as our target objects. The results of these experiments are presented in Table 4. RL performed slightly better than the Heuristic baseline, successfully completing 1 extra episode and achieving a success rate of 20%. This difference primarily stemmed from the pick and place sub-tasks. In the pick task, the RL Gaze skill plays a crucial role in achieving better alignment between the agent and the target object, which led to more successful grasping. Similarly, the RL place skill demonstrated more precision, ensuring that the object stayed closer to the surface of the receptacle.

Both simulation and real-world results show the baselines are promising, but insufficient, for Open-Vocabulary Mobile Manipulation. DETIC [23] caused many failures due to misclassification, both in simulation and the real world. Further, RL navigation was on par or better than heuristic policies in both sim and real. Although our RL place policy performed better in sim than heuristic place, it needs further improvement in the real world. Gaining the advantages of webscale pretrained vision-language models like DETIC, but tuned to our agents may be crucial for improving performance.

## 6 Limitations

Our benchmark has a few key limitations: (1) Due to simulation limitations, we don’t physically simulate grasping in the first version, which is why we provide a separate policy for this in the real world. Grasping is a well-studied problem [61–63], but simulations that train useful real-world grasp systems require special consideration. (2) We consider full natural language queries out-of-scope. Finally, (3) we do not implement many motion planners in HomeRobot (see Sec. D.2), or task-and-motion-planning with replanning, as would be ideal [64].

## 7 Conclusions and Future Work

We proposed a combined simulation and real-world benchmark to enable progress on the important problem of Open-Vocabulary Mobile Manipulation. We ran extensive experiments showing promising simulation and real-world results from two baselines: a heuristic baseline based on a state-of-the-art motion planner [2] and a reinforcement learning baseline trained with DDPPO [58]. In the future, we hope to improve the complexity of the problem space, adding more complex natural language and multi-step commands instead of pick-and-place, and provide end-to-end baselines instead of modular policies. Various proposed solutions for open-vocabulary navigation [9, 11, 12] and manipulation of unknown objects [10, 13, 18, 17] suggest possible ways of improving performance.



## References

- [1] D. Batra, A. Gokaslan, A. Kembhavi, O. Maksymets, R. Mottaghi, M. Savva, A. Toshev, and E. Wijmans. Objectnav revisited: On evaluation of embodied agents navigating to objects. *arXiv*, 2020.
- [2] T. Gervet, S. Chintala, D. Batra, J. Malik, and D. S. Chaplot. Navigating to objects in the real world. *arXiv*, 2022.
- [3] T. Wisspeintner, T. Van Der Zant, L. Iocchi, and S. Schiffer. Robocup@ home: Scientific competition and benchmarking for domestic service robots. *Interaction Studies*, 2009.
- [4] J. Bohren, R. B. Rusu, E. G. Jones, E. Marder-Eppstein, C. Pantofaru, M. Wise, L. Mösenlechner, W. Meeussen, and S. Holzer. Towards autonomous robotic butlers: Lessons learned with the pr2. In *ICRA*, 2011.
- [5] W. Burgard, A. B. Cremers, D. Fox, D. Hähnel, G. Lakemeyer, D. Schulz, W. Steiner, and S. Thrun. Experiences with an interactive museum tour-guide robot. *Artificial intelligence*, 1999.
- [6] M. Shridhar, J. Thomason, D. Gordon, Y. Bisk, W. Han, R. Mottaghi, L. Zettlemoyer, and D. Fox. Alfred: A benchmark for interpreting grounded instructions for everyday tasks. In *CVPR*, 2020.
- [7] X. Puig, K. Ra, M. Boben, J. Li, T. Wang, S. Fidler, and A. Torralba. Virtualhome: Simulating household activities via programs. In *CVPR*, 2018.
- [8] C. R. Garrett, R. Chitnis, R. Holladay, B. Kim, T. Silver, L. P. Kaelbling, and T. Lozano-Pérez. Integrated task and motion planning. *Annual Review of Control, Robotics, and Autonomous Systems*, 4:265–293, 2021.
- [9] B. Chen, F. Xia, B. Ichter, K. Rao, K. Gopalakrishnan, M. S. Ryoo, A. Stone, and D. Kappler. Open-vocabulary queryable scene representations for real world planning. *arXiv*, 2022.
- [10] A. Stone, T. Xiao, Y. Lu, K. Gopalakrishnan, K.-H. Lee, Q. Vuong, P. Wohlhart, B. Zitkovich, F. Xia, C. Finn, et al. Open-world object manipulation using pre-trained vision-language models. *arXiv*, 2023.
- [11] N. M. M. Shafiullah, C. Paxton, L. Pinto, S. Chintala, and A. Szlam. Clip-fields: Weakly supervised semantic fields for robotic memory. *arXiv*, 2022.
- [12] B. Bolte, A. Wang, J. Yang, M. Mukadam, M. Kalakrishnan, and C. Paxton. Usa-net: Unified semantic and affordance representations for robot memory. *arXiv*, 2023.
- [13] A. Curtis, X. Fang, L. P. Kaelbling, T. Lozano-Pérez, and C. R. Garrett. Long-horizon manipulation of unknown objects via task and motion planning with estimated affordances. In *ICRA*, 2022.
- [14] A. Radford, J. W. Kim, C. Hallacy, A. Ramesh, G. Goh, S. Agarwal, G. Sastry, A. Askell, P. Mishkin, J. Clark, et al. Learning transferable visual models from natural language supervision. In *ICML*, 2021.
- [15] K. M. Jatavallabhula, A. Kuwajerwala, Q. Gu, M. Omama, T. Chen, S. Li, G. Iyer, S. Saryazdi, N. Keetha, A. Tewari, et al. Conceptfusion: Open-set multimodal 3d mapping. *arXiv*, 2023.
- [16] J. Krantz, E. Wijmans, A. Majundar, D. Batra, and S. Lee. Beyond the nav-graph: Vision and language navigation in continuous environments. In *European Conference on Computer Vision (ECCV)*, 2020.
- [17] W. Liu, T. Hermans, S. Chernova, and C. Paxton. Structdiffusion: Object-centric diffusion for semantic rearrangement of novel objects. *arXiv*, 2022.

[18] D. Driess, F. Xia, M. S. Sajjadi, C. Lynch, A. Chowdhery, B. Ichter, A. Wahid, J. Tompson, Q. Vuong, T. Yu, et al. Palm-e: An embodied multimodal language model. *arXiv*, 2023.

[19] M. Khanna\*, Y. Mao\*, H. Jiang, S. Haresh, B. Schacklett, D. Batra, A. Clegg, E. Undersander, A. X. Chang, and M. Savva. Habitat Synthetic Scenes Dataset: An Analysis of 3D Scene Scale and Realism Tradeoffs for ObjectGoal Navigation. *arXiv*, 2023.

[20] M. Savva, A. Kadian, O. Maksymets, Y. Zhao, E. Wijmans, B. Jain, J. Straub, J. Liu, V. Koltun, J. Malik, D. Parikh, and D. Batra. Habitat: A Platform for Embodied AI Research. *ICCV*, 2019.

[21] A. Szot, A. Clegg, E. Undersander, E. Wijmans, Y. Zhao, J. Turner, N. Maestre, M. Mukadam, D. S. Chaplot, O. Maksymets, et al. Habitat 2.0: Training home assistants to rearrange their habitat. In *NeurIPS*, 2021.

[22] C. C. Kemp, A. Edsinger, H. M. Clever, and B. Matulevich. The design of stretch: A compact, lightweight mobile manipulator for indoor human environments. In *ICRA*, 2022.

[23] X. Zhou, R. Girdhar, A. Joulin, P. Krähenbühl, and I. Misra. Detecting twenty-thousand classes using image-level supervision. In *ECCV*, 2022.

[24] L. Weihs, M. Deitke, A. Kembhavi, and R. Mottaghi. Visual room rearrangement. In *CVPR*, 2021.

[25] K. Yadav, J. Krantz, R. Ramrakhya, S. K. Ramakrishnan, J. Yang, A. Wang, J. Turner, A. Gokaslan, V.-P. Berges, R. Mootaghi, O. Maksymets, A. X. Chang, M. Savva, A. Clegg, D. S. Chaplot, and D. Batra. Habitat challenge 2023. <https://aihabitat.org/challenge/2023/>, 2023.

[26] C. Gan, J. Schwartz, S. Alter, D. Mrowca, M. Schrimpf, J. Traer, J. De Freitas, J. Kubilius, A. Bhandwaldar, N. Haber, et al. Threedworld: A platform for interactive multi-modal physical simulation. *NeurIPS Datasets and Benchmarks Track*, 2021.

[27] X. Puig, K. Ra, M. Boben, J. Li, T. Wang, S. Fidler, and A. Torralba. Virtualhome: Simulating household activities via programs. In *CVPR*, 2018.

[28] M. Deitke, E. VanderBilt, A. Herrasti, L. Weihs, J. Salvador, K. Ehsani, W. Han, E. Kolve, A. Farhadi, A. Kembhavi, and R. Mottaghi. Proctor: Large-scale embodied ai using procedural generation. In *NeurIPS*, 2022.

[29] M. Deitke, W. Han, A. Herrasti, A. Kembhavi, E. Kolve, R. Mottaghi, J. Salvador, D. Schwenk, E. VanderBilt, M. Wallingford, L. Weihs, M. Yatskar, and A. Farhadi. RoboTHOR: An Open Simulation-to-Real Embodied AI Platform. In *CVPR*, 2020.

[30] C. Li, R. Zhang, J. Wong, C. Gokmen, S. Srivastava, R. Martín-Martín, C. Wang, G. Levine, M. Lingelbach, J. Sun, et al. Behavior-1k: A benchmark for embodied ai with 1,000 everyday activities and realistic simulation. In *CoRL*, 2023.

[31] T. Mu, Z. Ling, F. Xiang, D. C. Yang, X. Li, S. Tao, Z. Huang, Z. Jia, and H. Su. Maniskill: Generalizable manipulation skill benchmark with large-scale demonstrations. In *NeurIPS Datasets and Benchmarks Track*, 2021.

[32] E. Krotkov, D. Hackett, L. Jackel, M. Perschbacher, J. Pippine, J. Strauss, G. Pratt, and C. Orlowski. The darpa robotics challenge finals: Results and perspectives. *The DARPA Robotics Challenge Finals: Humanoid Robots To The Rescue*, 2018.

[33] G. Seetharaman, A. Lakhotia, and E. P. Blasch. Unmanned vehicles come of age: The darpa grand challenge. *Computer*, 2006.

- [34] M. Buehler, K. Iagnemma, and S. Singh. *The DARPA urban challenge: autonomous vehicles in city traffic*. Springer Berlin, Heidelberg, 2009.
- [35] N. Correll, K. E. Bekris, D. Berenson, O. Brock, A. Causo, K. Hauser, K. Okada, A. Rodriguez, J. M. Romano, and P. R. Wurman. Analysis and observations from the first amazon picking challenge. *IEEE Transactions on Automation Science and Engineering*, 2016.
- [36] L. D. Jackel, E. Krotkov, M. Perschbacher, J. Pippine, and C. Sullivan. The darpa lagr program: Goals, challenges, methodology, and phase i results. *Journal of Field Robotics*, 2006.
- [37] M. Müller and V. Koltun. Openbot: Turning smartphones into robots. In *ICRA*, 2021.
- [38] N. Kau, A. Schultz, N. Ferrante, and P. Slade. Stanford doggo: An open-source, quasi-direct-drive quadruped. In *ICRA*, 2019.
- [39] F. Grimmering, A. Meduri, M. Khadiv, J. Viereck, M. Wüthrich, M. Naveau, V. Berenz, S. Heim, F. Widmaier, J. Fiene, A. Badri-Spröwitz, and L. Righetti. An open torque-controlled modular robot architecture for legged locomotion research. *IEEE Robotics and Automation Letters*, 2019.
- [40] B. Yang, J. Zhang, V. H. Pong, S. Levine, and D. Jayaraman. Replab: A reproducible low-cost arm benchmark platform for robotic learning. *arXiv*, 2019.
- [41] D. V. Gealy, S. McKinley, B. Yi, P. Wu, P. R. Downey, G. Balke, A. Zhao, M. Guo, R. Thomasson, A. Sinclair, P. Cuellar, Z. McCarthy, and P. Abbeel. Quasi-direct drive for low-cost compliant robotic manipulation. In *ICRA*, 2019.
- [42] M. Wüthrich, F. Widmaier, F. Grimmering, S. Joshi, V. Agrawal, B. Hammoud, M. Khadiv, M. Bogdanovic, V. Berenz, J. Viereck, M. Naveau, L. Righetti, B. Schölkopf, and S. Bauer. Trifinger: An open-source robot for learning dexterity. In *CoRL*, 2020.
- [43] M. Ahn, H. Zhu, K. Hartikainen, H. Ponte, A. Gupta, S. Levine, and V. Kumar. ROBEL: ROBotics BEnchmarks for Learning with low-cost robots. In *CoRL*, 2019.
- [44] A. Murali, T. Chen, K. V. Alwala, D. Gandhi, L. Pinto, S. Gupta, and A. K. Gupta. Pyrobot: An open-source robotics framework for research and benchmarking. *arXiv*, 2019.
- [45] L. Paull, J. Tani, H. Ahn, J. Alonso-Mora, L. Carlone, M. Cáp, Y. F. Chen, C. Choi, J. Dusek, Y. Fang, D. Hoehener, S. Liu, M. M. Novitzky, I. F. Okuyama, J. Pazis, G. Rosman, V. Varricchio, H.-C. Wang, D. S. Yershov, H. Zhao, M. R. Benjamin, C. Carr, M. T. Zuber, S. Karaman, E. Frazzoli, D. D. Vecchio, D. Rus, J. P. How, J. J. Leonard, and A. Censi. Duckietown: An open, inexpensive and flexible platform for autonomy education and research. In *ICRA*, 2017.
- [46] B. Calli, A. Singh, A. Walsman, S. Srinivasa, P. Abbeel, and A. M. Dollar. The ycb object and model set: Towards common benchmarks for manipulation research. In *ICRA*, 2015.
- [47] D. Morrison, P. Corke, and J. Leitner. Egad! an evolved grasping analysis dataset for diversity and reproducibility in robotic manipulation. *IEEE Robotics and Automation Letters*, 2020.
- [48] B. Yang, P. E. Lancaster, S. S. Srinivasa, and J. R. Smith. Benchmarking robot manipulation with the rubik’s cube. *IEEE Robotics and Automation Letters*, 2020.
- [49] S. Dasari, J. Wang, J. Hong, S. Bahl, Y. Lin, A. S. Wang, A. Thankaraj, K. S. Chahal, B. Çalli, S. Gupta, D. Held, L. Pinto, D. Pathak, V. Kumar, and A. Gupta. Rb2: Robotic manipulation benchmarking with a twist. *arXiv*, 2022.
- [50] G. Zhou, V. Dean, M. K. Srirama, A. Rajeswaran, J. Pari, K. B. Hatch, A. Jain, T. Yu, P. Abbeel, L. Pinto, C. Finn, and A. Gupta. Train offline, test online: A real robot learning benchmark. *arXiv*, 2022.

- 413 [51] K. Kimble, K. Van Wyk, J. Falco, E. Messina, Y. Sun, M. Shibata, W. Uemura, and Y. Yokoko-  
414 hji. Benchmarking protocols for evaluating small parts robotic assembly systems. *IEEE*  
415 *Robotics and Automation Letters*, 2020.
- 416 [52] W. Lian, T. Kelch, D. Holz, A. Norton, and S. Schaal. Benchmarking off-the-shelf solutions to  
417 robotic assembly tasks. In *IROS*, 2021.
- 418 [53] A. Kadian, J. Truong, A. Gokaslan, A. Clegg, E. Wijmans, S. Lee, M. Savva, S. Chernova, and  
419 D. Batra. Are we making real progress in simulated environments? measuring the sim2real  
420 gap in embodied visual navigation. *arXiv*, 2019.
- 421 [54] P. Parashar, J. Vakil, S. Powers, and C. Paxton. Spatial-language attention policies for efficient  
422 robot learning. *arXiv*, 2023.
- 423 [55] E. Kolve, R. Mottaghi, W. Han, E. VanderBilt, L. Weihs, A. Herrasti, D. Gordon, Y. Zhu,  
424 A. Gupta, and A. Farhadi. AI2-THOR: an interactive 3d environment for visual AI. *arXiv*,  
425 2017.
- 426 [56] J. Collins, S. Goel, A. Luthra, L. Xu, K. Deng, X. Zhang, T. F. Y. Vicente, H. Arora, T. Diderik-  
427 sen, M. Guillaumin, et al. Abo: Dataset and benchmarks for real-world 3d object understanding.  
428 In *CVPR*, 2022.
- 429 [57] L. Downs, A. Francis, N. Koenig, B. Kinman, R. Hickman, K. Reymann, T. B. McHugh, and  
430 V. Vanhoucke. Google scanned objects: A high-quality dataset of 3d scanned household items.  
431 In *ICRA*, 2022.
- 432 [58] E. Wijmans, A. Kadian, A. Morcos, S. Lee, I. Essa, D. Parikh, M. Savva, and D. Batra. Dd-ppo:  
433 Learning near-perfect pointgoal navigators from 2.5 billion frames. In *ICLR*, 2019.
- 434 [59] J. Wu, R. Antonova, A. Kan, M. Lepert, A. Zeng, S. Song, J. Bohg, S. Rusinkiewicz, and  
435 T. Funkhouser. Tidybot: Personalized robot assistance with large language models. *arXiv*,  
436 2023.
- 437 [60] T. Zhou, R. Tucker, J. Flynn, G. Fyffe, and N. Snavely. Stereo magnification: Learning view  
438 synthesis using multiplane images. *SIGGRAPH*, 2018.
- 439 [61] M. Sundermeyer, A. Mousavian, R. Triebel, and D. Fox. Contact-graspnet: Efficient 6-dof  
440 grasp generation in cluttered scenes. In *ICRA*, 2021.
- 441 [62] A. Murali, A. Mousavian, C. Eppner, C. Paxton, and D. Fox. 6-dof grasping for target-driven  
442 object manipulation in clutter. In *ICRA*, 2020.
- 443 [63] H.-S. Fang, C. Wang, M. Gou, and C. Lu. Graspnet-1billion: A large-scale benchmark for  
444 general object grasping. In *CVPR*, 2020.
- 445 [64] C. R. Garrett, C. Paxton, T. Lozano-Pérez, L. P. Kaelbling, and D. Fox. Online replanning in  
446 belief space for partially observable task and motion problems. In *ICRA*, 2020.
- 447 [65] J. Deng, W. Dong, R. Socher, L.-J. Li, K. Li, and L. Fei-Fei. Imagenet: A large-scale  
448 hierarchical image database. In *CVPR*, 2009.
- 449 [66] A. Wang, A. Singh, J. Michael, F. Hill, O. Levy, and S. R. Bowman. GLUE: A multi-task  
450 benchmark and analysis platform for natural language understanding. In *ICLR*, 2019.
- 451 [67] Y. Bisk, R. Zellers, R. L. Bras, J. Gao, and Y. Choi. Piqa: Reasoning about physical common-  
452 sense in natural language. In *AAAI*, 2020.
- 453 [68] M. Sap, H. Rashkin, D. Chen, R. LeBras, and Y. Choi. SocialIQA: Commonsense reasoning  
454 about social interactions. In *EMNLP*, 2019.



- [69] R. Zellers, A. Holtzman, Y. Bisk, A. Farhadi, and Y. Choi. Hellaswag: Can a machine really finish your sentence? In *Proceedings of the 57th Annual Meeting of the Association for Computational Linguistics*, 2019.
- [70] S. Keisuke, L. B. Ronan, B. Chandra, and C. Yejin. Winogrande: An adversarial winograd schema challenge at scale. In *AAAI*, 2019.
- [71] T.-Y. Lin, M. Maire, S. Belongie, J. Hays, P. Perona, D. Ramanan, P. Dollár, and C. L. Zitnick. Microsoft coco: Common objects in context. In *ECCV*, 2014.
- [72] P. Rajpurkar, J. Zhang, K. Lopyrev, and P. Liang. Squad: 100,000+ questions for machine comprehension of text. In *EMNLP*, 2016.
- [73] L. Pinto and A. Gupta. Supersizing self-supervision: Learning to grasp from 50k tries and 700 robot hours. In *ICRA*, 2016.
- [74] S. Levine, P. Pastor, A. Krizhevsky, J. Ibarz, and D. Quillen. Learning hand-eye coordination for robotic grasping with deep learning and large-scale data collection. *IJRR*, 2018.
- [75] M. Ahn, A. Brohan, N. Brown, Y. Chebotar, O. Cortes, B. David, C. Finn, C. Fu, K. Gopalakrishnan, K. Hausman, A. Herzog, D. Ho, J. Hsu, J. Ibarz, B. Ichter, A. Irpan, E. Jang, R. J. Ruano, K. Jeffrey, S. Jesmonth, N. Joshi, R. Julian, D. Kalashnikov, Y. Kuang, K.-H. Lee, S. Levine, Y. Lu, L. Luu, C. Parada, P. Pastor, J. Quiambao, K. Rao, J. Rettinghouse, D. Reyes, P. Sermanet, N. Sievers, C. Tan, A. Toshev, V. Vanhoucke, F. Xia, T. Xiao, P. Xu, S. Xu, M. Yan, and A. Zeng. Do as i can and not as i say: Grounding language in robotic affordances. In *CoRL*, 2022.
- [76] A. Mandlekar, Y. Zhu, A. Garg, J. Booher, M. Spero, A. Tung, J. Gao, J. Emmons, A. Gupta, E. Orbay, S. Savarese, and L. Fei-Fei. Roboturk: A crowdsourcing platform for robotic skill learning through imitation. In *CoRL*, 2018.
- [77] P. Sharma, L. Mohan, L. Pinto, and A. K. Gupta. Multiple interactions made easy (mime): Large scale demonstrations data for imitation. In *CoRL*, 2018.
- [78] J. Mahler, J. Liang, S. Niyaz, M. Laskey, R. Doan, X. Liu, J. A. Ojea, and K. Goldberg. Dex-net 2.0: Deep learning to plan robust grasps with synthetic point clouds and analytic grasp metrics. *arXiv*, 2017.
- [79] S. Dasari, F. Ebert, S. Tian, S. Nair, B. Bucher, K. Schmeckpeper, S. Singh, S. Levine, and C. Finn. Robonet: Large-scale multi-robot learning. *arXiv*, 2019.
- [80] A. Gupta, A. Murali, D. P. Gandhi, and L. Pinto. Robot learning in homes: Improving generalization and reducing dataset bias. In *NeurIPS*, 2018.
- [81] P. Anderson, Q. Wu, D. Teney, J. Bruce, M. Johnson, N. Sünderhauf, I. D. Reid, S. Gould, and A. van den Hengel. Vision-and-language navigation: Interpreting visually-grounded navigation instructions in real environments. In *CVPR*, 2017.
- [82] H. Team. Habitat CVPR challenge, 2019. URL <https://aihabitat.org/challenge/2019/>.
- [83] F. Xia, W. B. Shen, C. Li, P. Kasimbeg, M. Tchapmi, A. Toshev, R. Martín-Martín, and S. Savarese. Interactive gibbon benchmark: A benchmark for interactive navigation in cluttered environments. *IEEE Robotics and Automation Letters*, 2020.
- [84] C. Chen, U. Jain, C. Schissler, S. V. A. Gari, Z. Al-Halah, V. K. Ithapu, P. Robinson, and K. Grauman. Soundspaces: Audio-visual navigation in 3d environments. In *ECCV*, 2020.
- [85] K. Ehsani, W. Han, A. Herrasti, E. VanderBilt, L. Weihs, E. Kolve, A. Kembhavi, and R. Mottaghi. Manipulathor: A framework for visual object manipulation. In *CVPR*, 2021.

- 499 [86] T. Yu, D. Quillen, Z. He, R. Julian, K. Hausman, C. Finn, and S. Levine. Meta-world: A  
500 benchmark and evaluation for multi-task and meta reinforcement learning. In *CoRL*, 2019.
- 501 [87] S. James, Z. Ma, D. R. Arrojo, and A. J. Davison. Rlbench: The robot learning benchmark &  
502 learning environment. *IEEE Robotics and Automation Letters*, 2020.
- 503 [88] A. Ku, P. Anderson, R. Patel, E. Ie, and J. Baldridge. Room-across-room: Multilingual  
504 vision-and-language navigation with dense spatiotemporal grounding. In *EMNLP*, 2020.
- 505 [89] A. Padmakumar, J. Thomason, A. Shrivastava, P. Lange, A. Narayan-Chen, S. Gella, R. Pi-  
506 ramithu, G. Tur, and D. Hakkani-Tur. TEACH: Task-driven embodied agents that chat. In  
507 *AAAI*, 2022.
- 508 [90] X. Gao, Q. Gao, R. Gong, K. Lin, G. Thattai, and G. S. Sukhatme. Dialfred: Dialogue-enabled  
509 agents for embodied instruction following. *IEEE Robotics and Automation Letters*, 2022.
- 510 [91] A. Szot, K. Yadav, A. Clegg, V.-P. Berges, A. Gokaslan, A. Chang, M. Savva, Z. Kira, and  
511 D. Batra. Habitat rearrangement challenge. [https://aihabitat.org/challenge/2022\\_](https://aihabitat.org/challenge/2022_rearrange)  
512 [rearrange](https://aihabitat.org/challenge/2022_rearrange), 2022.
- 513 [92] C. M. Kim, M. Danielczuk, I. Huang, and K. Goldberg. Simulation of parallel-jaw grasping  
514 using incremental potential contact models. In *ICRA*, 2022.
- 515 [93] D. Hall, B. Talbot, and N. Sünderhauf. The robotic vision challenges. [https://](https://nikosuenderhauf.github.io/roboticvisionchallenges/cvpr2022)  
516 [nikosuenderhauf.github.io/roboticvisionchallenges/cvpr2022](https://nikosuenderhauf.github.io/roboticvisionchallenges/cvpr2022), 2022.
- 517 [94] A. Mousavian, C. Eppner, and D. Fox. 6-dof graspnet: Variational grasp generation for object  
518 manipulation. In *ICCV*, 2019.
- 519 [95] C. Paxton, C. Xie, T. Hermans, and D. Fox. Predicting stable configurations for semantic  
520 placement of novel objects. In *CoRL*, 2022.
- 521 [96] S. Kohlbrecher, J. Meyer, O. von Stryk, and U. Klingauf. A flexible and scalable slam system  
522 with full 3d motion estimation. In *Proc. IEEE International Symposium on Safety, Security*  
523 *and Rescue Robotics (SSRR)*. IEEE, November 2011.
- 524 [97] J. J. Kuffner and S. M. LaValle. Rrt-connect: An efficient approach to single-query path  
525 planning. In *ICRA*, 2000.
- 526 [98] D. S. Chaplot, D. P. Gandhi, A. Gupta, and R. R. Salakhutdinov. Object goal navigation using  
527 goal-oriented semantic exploration. In *NeurIPS*, 2020.
- 528 [99] B. Yamauchi. A frontier-based approach for autonomous exploration. In *IEEE International*  
529 *Symposium on Computational Intelligence in Robotics and Automation*, 1997.
- 530 [100] J. A. Sethian. Fast marching methods. *SIAM review*, 1999.
- 531 [101] D. S. Chaplot, S. Gupta, A. Gupta, and R. Salakhutdinov. Learning to explore using active  
532 neural mapping. *ICLR*, 2020.
- 533 [102] M. Quigley, K. Conley, B. Gerkey, J. Faust, T. Foote, J. Leibs, R. Wheeler, A. Y. Ng, et al. Ros:  
534 an open-source robot operating system. In *ICRA Workshop on Open Source Software*, 2009.

# Appendix

## Table of Contents

|          |                                                                      |           |
|----------|----------------------------------------------------------------------|-----------|
| <b>A</b> | <b>Extended Related Work</b>                                         | <b>15</b> |
| <b>B</b> | <b>Metrics</b>                                                       | <b>16</b> |
| B.1      | Simulation Success Metrics . . . . .                                 | 16        |
| B.2      | Real World Success Metrics . . . . .                                 | 16        |
| <b>C</b> | <b>Simulation Details</b>                                            | <b>17</b> |
| C.1      | Object Categories Appearing in the Scene Dataset . . . . .           | 17        |
| C.2      | Episode Generation Details . . . . .                                 | 18        |
| C.3      | Improved scene visuals . . . . .                                     | 19        |
| C.4      | Action Space Implementation . . . . .                                | 21        |
| <b>D</b> | <b>HomeRobot Implementation Details</b>                              | <b>21</b> |
| D.1      | Pose Information . . . . .                                           | 22        |
| D.2      | Low-Level Control for Navigation . . . . .                           | 22        |
| D.3      | Heuristic Grasping Policy . . . . .                                  | 22        |
| D.4      | Heuristic Placement Policy . . . . .                                 | 23        |
| D.5      | Navigation Planning . . . . .                                        | 24        |
| D.6      | Navigation Limitations . . . . .                                     | 25        |
| <b>E</b> | <b>Reinforcement Learning Baseline</b>                               | <b>25</b> |
| E.1      | Action Space . . . . .                                               | 26        |
| E.2      | Observation Space . . . . .                                          | 26        |
| E.3      | Training Setup . . . . .                                             | 26        |
| <b>F</b> | <b>Additional Analysis</b>                                           | <b>28</b> |
| F.1      | Number of steps taken in each stage by different baselines . . . . . | 28        |
| F.2      | Performance on Seen vs. Unseen Object Categories . . . . .           | 29        |
| <b>G</b> | <b>Hardware Setup</b>                                                | <b>31</b> |
| G.1      | Hardware Choice . . . . .                                            | 31        |
| G.2      | Visualizing The Robot . . . . .                                      | 32        |

## A Extended Related Work

It is difficult to do justice to the rich embodied AI, natural language, computer vision, machine learning, and robotics communities that have addressed aspects of the work presented here. The following extends some of the discussion from the main manuscript about important advances that the community has made.

Benchmarks have helped the community focus their efforts and fairly compare system performance. For example, the YCB objects [46] allowed for direct comparison of results across manipulators and models. While benchmarks and leaderboards are comparatively rare in robotics [45, 51, 29, 49, 60, 3, 35], they have been hugely influential in machine learning (e.g. ImageNet [65], GLUE [66], and various language benchmarks [67–70], COCO [71], and SQuAD [72]). In robotics, competitions such as RoboCup@Home [3], the Amazon Picking Challenge [35], and the NIST task board [51] are prevalent and influential as an alternative, but generally systems aren’t reproducible across teams.

**Datasets.** In addition to the environments referenced in Table 1, offline datasets including robot interactions with scenes have been used widely to train models. These datasets are typically obtained using robots alone (e.g., [73, 74]), by teleoperation (e.g., [75, 76]) or human-robot demonstration (e.g., [77]). Previous work such as [78] aim to collect large-scale datasets while works such as [79] consider scaling across multiple embodiments. [80] take a step further by collecting robot data in unstructured environments. Unlike these works, we do not limit our users to a specific dataset. Instead, we provide a simulator with various scenes that can generate large-scale consistent data for training. Also, note that we test the models in unseen environments, while most of the mentioned works use the same environment for training and testing.

**Simulation benchmarks.** The embodied AI community has provided various benchmarks in simulation platforms for tasks such as navigation [1, 81–84], object manipulation [85, 31, 86, 87], instruction following [6, 88–90], room rearrangement [24, 91], grasping [92] and SLAM [93]. While these benchmarks ensure reproducibility and fair comparison of different methods, there is always a gap between simulation and reality since it is infeasible to model all details of the real world in simulation. Our benchmark, in contrast, enables fair comparison of different methods and reproducibility of the results in the real world. Additionally, previous benchmarks often operate in a simplified discrete action space [20, 6], even forcing that structure on the real world [2].

**Robotics benchmarking.** Robotics benchmarks must contend with the diversity of hardware, morphology, and resources across labs. One solution is simulation [87, 55, 31, 20, 21, 83, 86, 6], which can provide reproducible and fair evaluations. However, the sim-to-real gap means simulation results may not be indicative of progress in the real world [2]. Another proposed solution is robotic competitions such as RoboCup@Home [3], the Amazon Picking Challenge [35], and the NIST task board [51]. However, participants typically use their own hardware, making it difficult to conduct fair comparisons of the different underlying methods, and means results are not transferable to different labs or settings. This is also a large barrier to entry to these competitions.

## B Metrics

We informally defined our scoring metrics in Sec. 3. Here, we provide formal definitions of our partial success metrics.

### B.1 Simulation Success Metrics

Success in simulation is defined per stage as:

- **FindObj:** Successful if the agent reaches within 0.1m of a viewpoint of the target object on `start_receptacle`, and at least 0.1% of the pixels in its camera frame belong to an object instance.
- **Pick:** Successful if **FindObj** succeeded, the agent enables the gripper at an instant where an object instance is visible and its end-effector reaches within 0.8m of a target object. We magically snap the object to the agent’s gripper in simulation.
- **FindRec:** Successful if **Pick** succeeded, and the agent reaches within 0.1m of a viewpoint of a `goal_receptacle`, and at least 0.1% of the pixels in its camera frame belong to the object containing a valid receptacle.
- **Place:** Successful if **FindRec** succeeded, the agent releases the object and subsequently the object stays in contact with the `goal_receptacle` with linear and angular velocities below a threshold of  $1e - 3$  m/s and  $1e - 3$  rad/s respectively for 50 contiguous steps.

An episode is considered to have succeeded if it succeeds in all 4 stages within 1250 steps.

### B.2 Real World Success Metrics

Success in real world is defined per stage as:



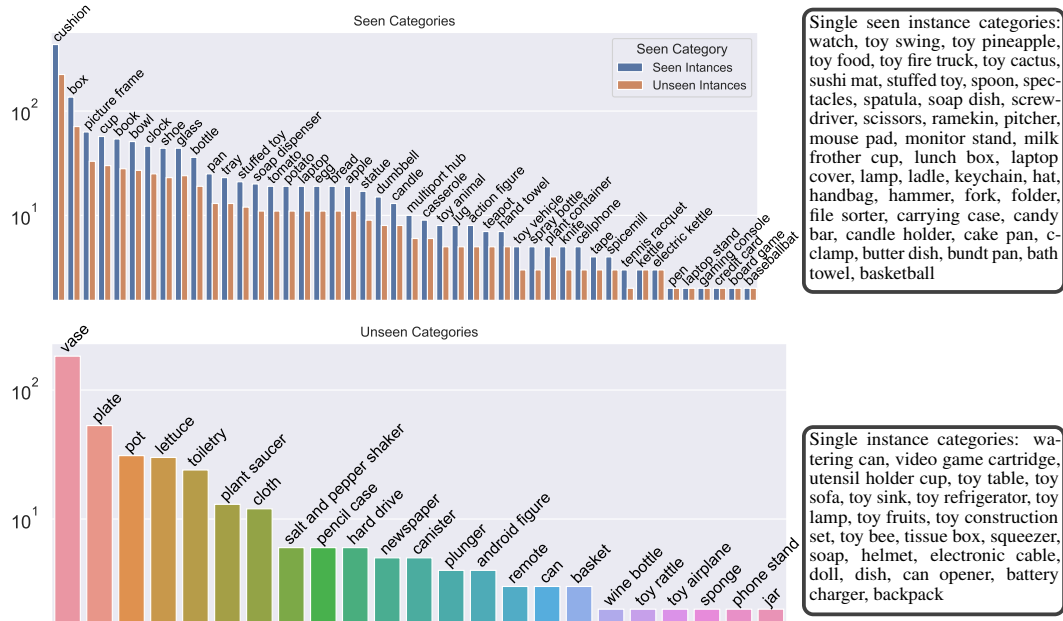

Figure 5: Number of objects across different splits, for both seen categories and unseen categories. We divide objects between categories which appear in training data – *seen categories* – and those that do not – *unseen categories*. The goal of Open-Vocabulary Mobile Manipulation is to be able to find and manipulate objects specified by language.

- 625 • **FindObj:** Successful if the agent reaches within 1m of the target object on `start_receptacle`
- 626 and the object is visible in the RGB image from the camera.
- 627 • **Pick:** Successful if **FindObj** succeeded and the agent successfully picks up the object from the
- 628 `start_receptacle`.
- 629 • **FindRec:** Successful if **Pick** succeeded, and the agent reaches within 1m of a `goal_receptacle`,
- 630 and the `goal_receptacle` is visible in the RGB image from the camera.
- 631 • **Place:** Successful if **FindRec** succeeded and the agent places object on a `goal_receptacle`
- 632 and the object settles down on the `goal_receptacle` stably.
- 633 Given that the scene we use in the real world is much smaller than the apartments in simulation,
- 634 we allow the agent to act in the environment for 300 timesteps. The episode is considered to have
- 635 succeeded if it succeeds in all 4 stages.

## 636 C Simulation Details

### 637 C.1 Object Categories Appearing in the Scene Dataset

638 action\_figure, android\_figure, apple, backpack, baseballbat, basket, basketball,  
 639 bath\_towel, battery\_charger, board\_game, book, bottle, bowl, box, bread, bundt\_pan,  
 640 butter\_dish, c-clamp, cake\_pan, can, can\_opener, candle, candle\_holder, candy\_bar,  
 641 canister, carrying\_case, casserole, cellphone, clock, cloth, credit\_card, cup,  
 642 cushion, dish, doll, dumbbell, egg, electric\_kettle, electronic\_cable, file\_sorter,  
 643 folder, fork, gaming\_console, glass, hammer, hand\_towel, handbag, hard\_drive, hat,  
 644 helmet, jar, jug, kettle, keychain, knife, ladle, lamp, laptop, laptop\_cover,  
 645 laptop\_stand, lettuce, lunch\_box, milk\_frother\_cup, monitor\_stand, mouse\_pad,  
 646 multiport\_hub, newspaper, pan, pen, pencil\_case, phone\_stand, picture\_frame,  
 647 pitcher, plant\_container, plant\_saucer, plate, plunger, pot, potato, ramekin,

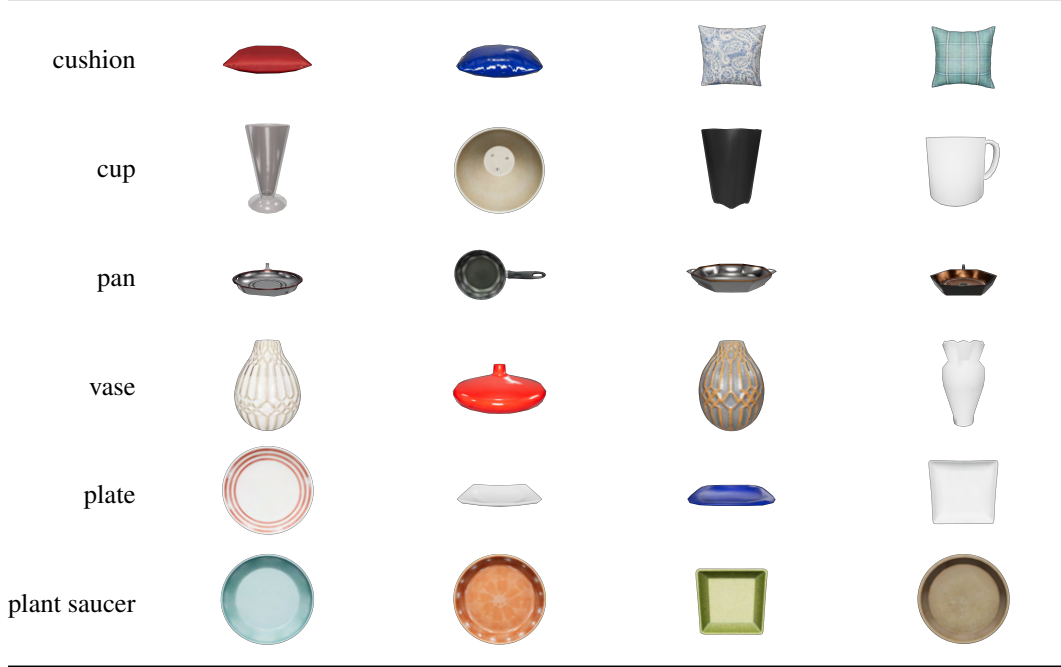

Figure 6: Example objects in our object dataset across 6 categories. The cushion, cup, and pan categories are in the train split, and the vase, plate, and plant saucer are in the validation and test sets.

remote, salt\_and\_pepper\_shaker, scissors, screwdriver, shoe, soap, soap\_dish,  
 soap\_dispenser, spatula, spectacles, spicemill, sponge, spoon, spray\_bottle,  
 squeezer, statue, stuffed\_toy, sushi\_mat, tape, teapot, tennis\_racquet,  
 tissue\_box, toiletry, tomato, toy\_airplane, toy\_animal, toy\_bee, toy\_cactus,  
 toy\_construction\_set, toy\_fire\_truck, toy\_food, toy\_fruits, toy\_lamp, toy\_pineapple,  
 toy\_rattle, toy\_refrigerator, toy\_sink, toy\_sofa, toy\_swing, toy\_table, toy\_vehicle,  
 tray, utensil\_holder\_cup, vase, video\_game\_cartridge, watch, watering\_can,  
 wine\_bottle

In Fig. 6 we show some of the examples of a selection of these categories from the training and validation/test splits.

## C.2 Episode Generation Details

When generating episodes, we find the largest indoor navigable area in each scene, and then filter the list of all receptacles from this scene that are too small for object placement. Fig. 7 shows the navigable islands in several of our scenes (top row), and corresponding top-down views of each scene in the bottom row. We then sample objects according to the current split (train, validation, or test). We run physics to ensure that objects are placed in stable locations. Then we select objects randomly from the appropriate set, as determined by the current split.

Finally, we generate a set of candidate viewpoints, shown in Fig. 8, which represent navigable locations to which the robot can move for each receptacle. These are used for training specific skills, such as navigation to receptacles. Each viewpoint corresponds to a particular `start_receptacle` or `goal_receptacle`, and represents a nearby location where the robot can see the receptacle and is within 1.5 meters. Fig. 9 gives examples of where these viewpoints are created.

**Navmesh:** We precompute a navigable scene geometry as done in [20] for faster collision checks of the agent with the scene. The “mesh” comprising this navigable geometry is referred to as a navmesh.

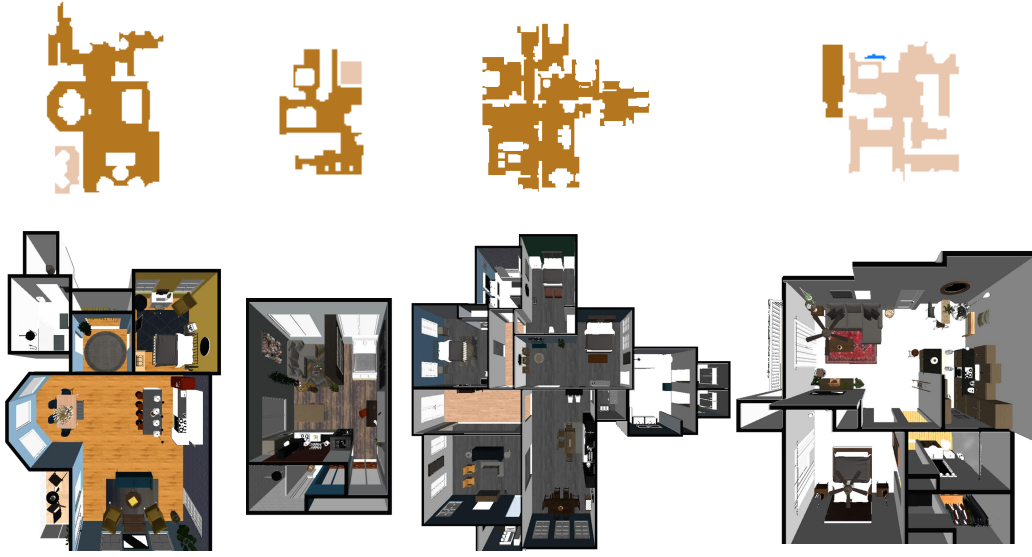

Figure 7: Visualization of the navigable geometry (top row) and top-down views of example scenes from the Habitat Synthetic Scenes Dataset (HSSD) [19]. We use the computed navigable area to efficiently generate a large number of episodes for the Open-Vocabulary Mobile Manipulation task. Object placement positions are sampled to be near navigable areas of the map, atop one of a large variety of different receptacles, such that the robot can reach them.

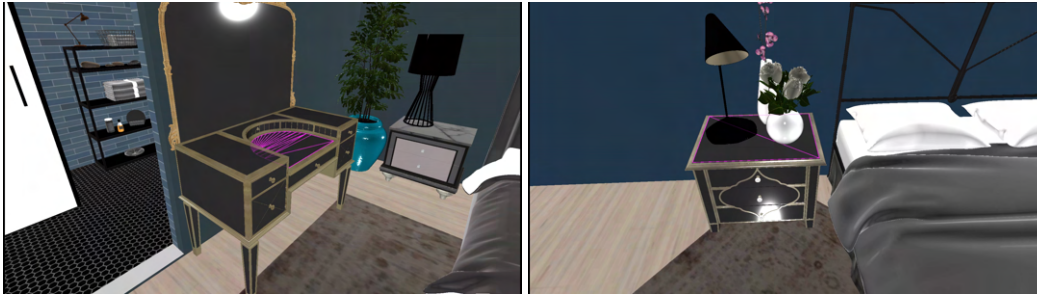

Figure 8: First-person view from different precomputed viewpoints in our episode dataset. These viewpoints are used as goals for training navigation skills, and are used in the initialization of the placement and gaze/grasping skills as well. The purple mesh indicates receptacle surface.

672 **Number of objects:** This is dynamically set per scene to  $1.5-2\times$  the total available receptacle area in  
 673  $m^2$ . For example, if the total receptacle surface area for a scene is  $10m^2$ , then 15-20 objects will be  
 674 placed. The exact number of objects will be randomly selected per episode to be in this range.

675 The full set of included receptables in simulation is: bathtub, bed, bench, cabinet, chair,  
 676 chest\_of\_drawers, couch, counter, filing\_cabinet, hamper, serving cart,  
 677 shelves, shoe Rack, sink, stand, stool, table, toilet, trunk, wardrobe, &  
 678 washer\_dryer.

### 679 C.3 Improved scene visuals

680 We rewrote and expanded the existing Physically-Based Rendering shader (PBR) and added Horizon-  
 681 based Ambient Occlusion (HBAO) to the Habitat renderer, which led to notable improvements in  
 682 viewing quality which were necessary for using the HSSD [19] dataset.

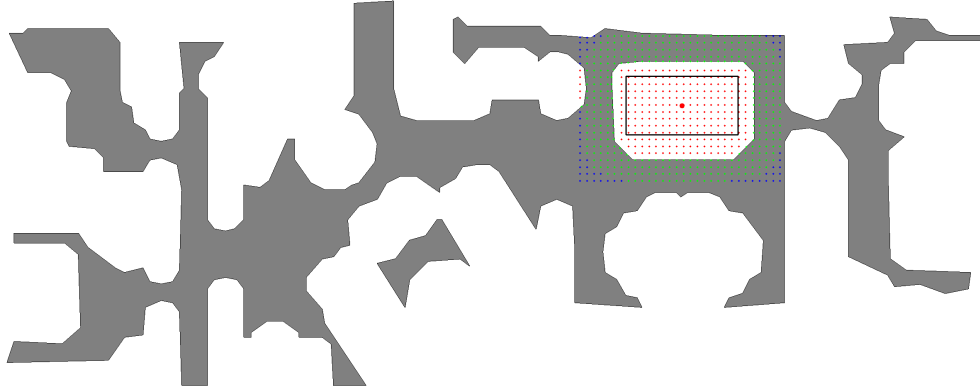

Figure 9: Viewpoints created for an object during episode generation. The gray area is the navigable region of the scene. The big red dot and the black box are the object’s center and bounding box respectively. The surrounding dots are viewpoint candidates: red dots were rejected because they weren’t navigable, and blue dots were rejected because they were too far from the object. The green dots are the final set of viewpoints.

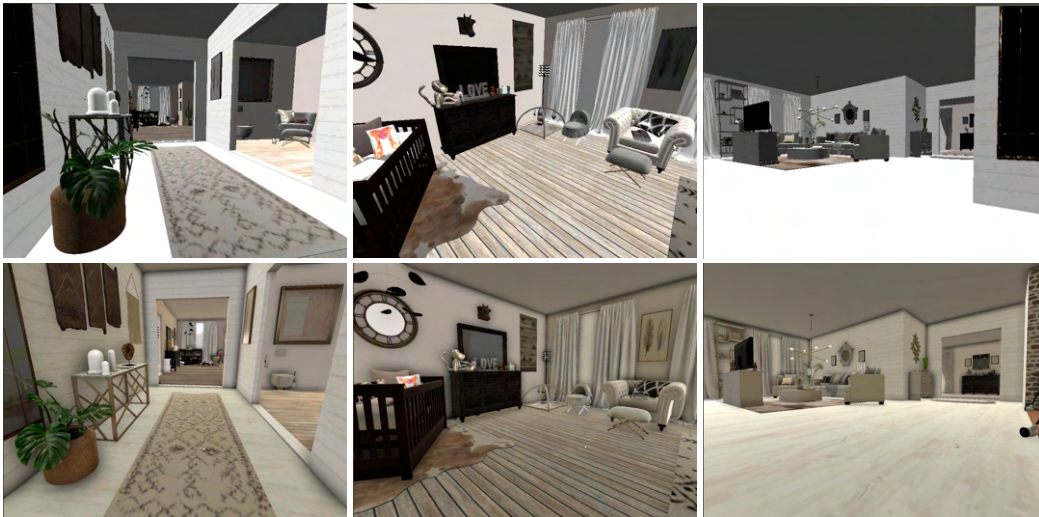

Figure 10: Here we present the improvements in scene visuals with Horizon-based Ambient Occlusion (HBAO) and expanded Physics-based Rendering (PBR) material support added to the Habitat renderer. The top row shows images from the default renderer whereas the bottom row shows the improved renderings.

- 683 • Rewrote PBR and Image Based Lighting (IBL) base calculations.
- 684 • Added multi-layer material support covering `KHR_materials_clearcoat`,
- 685 `KHR_materials_specular`, `KHR_materials_ior`, and `KHR_materials_anisotropy`
- 686 for both direct and indirect (IBL) lighting.
- 687 • Added tangent frame synthesis if precomputed tangents are not provided.
- 688 • Added HDR Environment map support for IBL.

689 We present comparisons between default Habitat visuals and improved renderings in Figure 10.



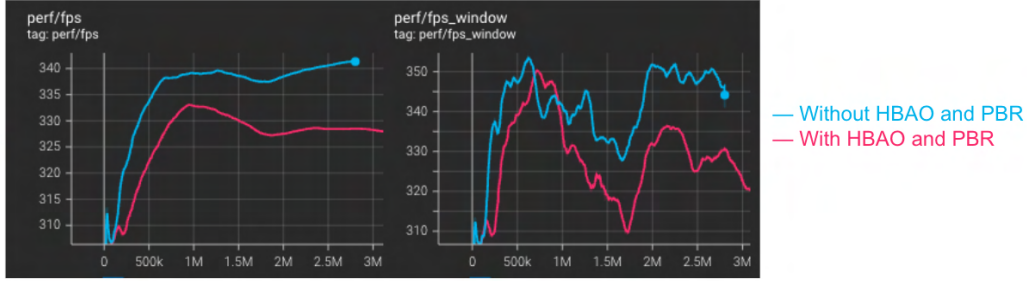

Figure 11: **Minor drop in FPS with improved scene rendering:** Here, we benchmark the training speeds (through FPS numbers) of two ObjectNav training runs with and without the HBAO and PBR-based improved scene visuals. We observe that the improved rendering leads to a very small drop in FPS from around 340 to 330 (3 % drop).

We also benchmark the ObjectNav training speeds of a DDPPPO-based RL agent with and without the improved rendering and present the results in 11. We see that the improvement in scene lighting and rendering comes at the cost of only a 3% dip in training FPS (decreasing from around 340 to around 330).

#### C.4 Action Space Implementation

We look at two different choices of action space for our navigation agents, either making discrete or continuous predictions about where to move next. Our expectation from prior work might be that the discrete action space would be notably easier for agents to work with.

**Discrete.** Previous benchmarks often operate in a fully discrete action space [20, 6], even in the real world [2]. We implement a set of discrete actions, with fixed in-place rotation left and right, and translation of steps  $0.25m$  forward.

**Continuous.** Our continuous action space is implemented as a teleporting agent, where the robot needs to move around by predicting a local waypoint. Our robot’s low level controllers are expected to be able to get the robot to this location, in lieu of simulating full physics for the agent.

In simulation, this is implemented as a check against the navmesh - we use the navmesh to determine if the robot will go into collision with any objects if moved towards the new location, and move it to the closest valid location instead.

## D HomeRobot Implementation Details

Here, we describe more specifics for how we implemented the heuristic policies provided as a baseline to accelerate home assistant robot research.

Although there exists a considerable body of prior research looking at learning specific grasping [94, 62, 63, 61] or placement [95, 17] skills, we found that it was easiest to implement heuristic policies with low CPU/GPU requirements and high interpretability. Other recent works have similarly used heuristic grasping and placement policies to great affect (e.g. TidyBot [59]).

There are three different repositories within the open-source HomeRobot library:

- `home_robot`: Shared components such as Environment interfaces, controllers, detection and segmentation modules.
- `home_robot_sim`: Simulation stack with Environments based on Habitat.
- `home_robot_hw`: Hardware stack with server processes that runs on the robot, client API that runs on the GPU workstation, and Environments built using the client API.

Most policies are implemented in the core `home_robot` library. Within HomeRobot, we also divide functionality between **Agents** and **Environments**, similar to how many reinforcement learning benchmarks are set up [20].

- **Agents** contain all of the necessary code to execute policies. We implement agents which use a mixture of heuristic policies and policies learned on our scene dataset via reinforcement learning.
- **Environments** provide common logic; they provide **Observations** to the Agent, and a function which allows them to apply their action to the (real or simulated) environment.

## D.1 Pose Information

We get the global robot pose from Hector SLAM [96] on the Hello Robot Stretch [22], which is used when creating 2d semantic maps for our model-based navigation policies.

## D.2 Low-Level Control for Navigation

The Hello Stretch software provides a native interface for controlling the linear and angular velocities of the differential-drive robot base. While we do expose an interface for users to control these velocities directly, it is desirable to have desired short-term goals as a more intuitive action space for policies, and to make them update-able at any instant to allow for replanning.

Thus, we implemented a velocity controller that produces continuous velocity commands that moves the robot to an input goal pose. The controller operates in a heuristic manner: by rotating the robot so that it faces the goal position at all times while moving towards the goal position, and then rotating to reach the goal orientation once goal position is reached. The velocities to induce these motions are inferred with a trapezoidal velocity profile and some conditional checks to prevent it from overshooting the goal.

**Limitations** The Fast Marching Method-based motion planning from prior work [2] that we describe in Sec. D.2. It assumes the agent is a cylinder, and therefore is much more limited in where it can navigate than, e.g., a sampling based motion planner like RRT-connect [97] which can take orientation into account. In addition, our semantic mapping requires a list of classes for use with DETIC [23]; instead, it would be good to use a fully open-vocabulary scene representation like CLIP-Fields [11], ConceptFusion [15], or USA-Net [12], which would also improve our motion planning significantly.

## D.3 Heuristic Grasping Policy

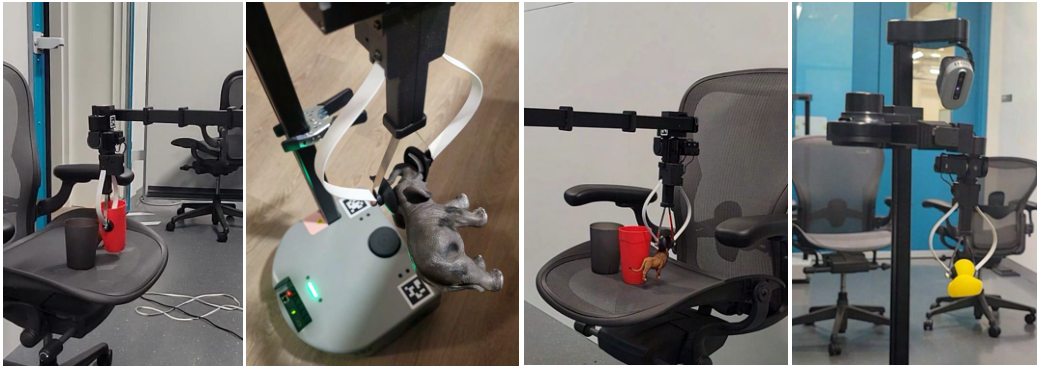

Figure 12: Grasping tests in various lab environments. To provide a strong baseline, we tuned the grasp policy to be highly reliable given the Stretch’s viewpoint, on a variety of objects.

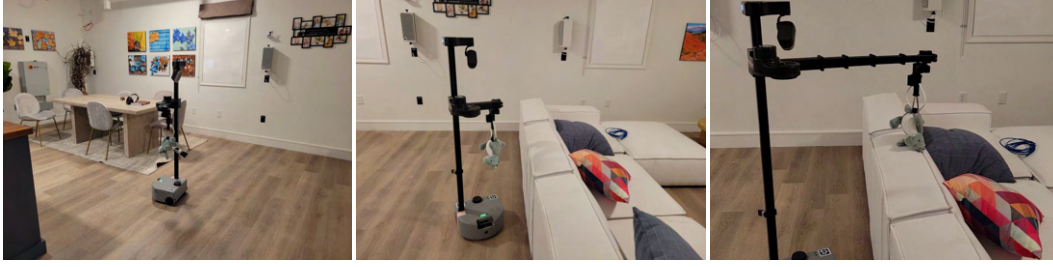

Figure 13: An example of the robot navigating to a `goal_receptacle` (sofa) and using the heuristic place policy to put down the object (stuffed animal). Heuristic policies provide an interpretable and easily extended baseline.

Numerous powerful grasp generation models have been proposed in the literature, such as GraspNet-1Billion [63], 6-DOF GraspNet [62], and Contact-GraspNet [61]. However, for transparency, reproducibility, and ease of installation, we implement a simple, heuristic grasping policy, which assumes a parallel gripper performing top-down grasps. Heuristic grasp policies appear throughout robotics research (e.g. in TidyBot [59]). In our case, the heuristic policy voxelizes the point cloud, and chooses areas at the top of the object where points exist, surrounded by free space, in order to grasp. Fig. 12 shows the simple grasp policy in action and additional details are presented in Sec. D.3. This policy works well on a wide variety of objects, and we saw comparable performance to the state-of-the-art open-source grasping models we tested [61, 63].

The intuition is to identify areas where the gripper fingers can descend unobstructed into two sides of a physical part of the object, which we do through a simple voxelization scheme. We take the top 10% of points in an object, voxelize at a fixed resolution of 0.5cm, and choose grasps with free voxels (where fingers can go) on either side of occupied voxels. In practice, this achieved a high success rates on a variety of real objects.

The procedure is as follows:

1. Given a target object point cloud, convert the point cloud into voxels of size 0.5 cm.
2. Select top 10% occupied voxels with the highest Z coordinates.
3. Project the selected voxels into a 2-D grid.
4. Consider grasps centered around each occupied voxel, and identify three regions: two where the gripper fingers will be and one representing the space between the fingers.
5. Score each grasp based on 1) how occupied the region between the fingers is, and 2) how empty the two surrounding regions are.
6. Perform smoothing on the grasp scores to reject outliers (done by multiplying scores with adjacent scores).
7. Output grasps with final scores above some threshold.

We compared this policy to other methods like ContactGraspnet [61], 6-DoF Graspnet [62, 94], and Graspnet 1-Billion [63]. We saw more intermittent failures due to sensor noise using these pretrained methods, even after adapting the grasp offsets to fit to the Hello Robot Stretch’s gripper geometry. In the end, we leave training better grasp policies to future work.

#### D.4 Heuristic Placement Policy

As with grasping, a number of works on stable placement of objects have been proposed in the literature [95, 17]. To provide a reasonable baseline, we implement a heuristic placement strategy that assumes that the end-receptacle is at least barely visible when it takes over; projects the segmentation

mask onto the point cloud and chooses a voxel on the top of the object. Fig. 13 shows an example of the place policy being executed in the real world.

Specifically, our heuristic policy is implemented as such:

1. Detect the end-receptacle in egocentric RGB observations (using DETIC [23]), project predicted image segment to a 3D point cloud using depth, and transform point cloud to robot base coordinates using camera height and tilt.
2. Estimate placement point: Randomly sample 50 points on the point cloud and choose one that is at the center of the biggest (point cloud) slab for placing objects. This is done by scoring each point based on the number of surrounding points in the X/Y plane (Z is up) within a 3 cm height threshold.
3. Rotate robot for it to be facing the placement point, then move robot forward if it is more than 38.5 cm away (length of retracted arm + approximate length of the Stretch gripper).
4. Re-estimate placement point from this new robot position.
5. Accordingly, set arm’s extension and lift values to have the gripper be a few cm above placement position. Then, release the object to land on the receptacle.

## D.5 Navigation Planning

Our heuristic baseline extends prior work [2], which was shown to work in a wide range of human environments. We tune it for navigating close to other objects and extended it to work in our continuous action space – challenging navigation aspects not present in the original paper. The baseline has three components:

**Semantic Mapping Module.** The semantic map stores relevant objects, explored regions, and obstacles. To construct the map, we predict semantic categories and segmentation masks of objects from first-person observations. We use Detic [23] for object detection and instance segmentation and backproject first-person semantic segmentation into a point cloud using the perceived depth, bin it into a 3D semantic voxel map, and finally sum over the height to compute a 2D semantic map.

We keep track of objects detected, obstacles, and explored areas in an explicit metric map of the environment from [98]. Concretely, it is a binary  $K \times M \times M$  matrix where  $M \times M$  is the map size and  $K$  is the number of map channels. Each cell of this spatial map corresponds to  $25 \text{ cm}^2$  ( $5 \text{ cm} \times 5 \text{ cm}$ ) in the physical world. Map channels  $K = C + 4$  where  $C$  is the number of semantic object categories, and the remaining 4 channels represent the obstacles, the explored area, and the agent’s current and past locations. An entry in the map is one if the cell contains an object of a particular semantic category, an obstacle, or is explored, and zero otherwise. The map is initialized with all zeros at the beginning of an episode and the agent starts at the center of the map facing east.

**Frontier Exploration Policy.** We explore the environment with a heuristic frontier-based exploration policy [99]. This heuristic selects as the goal the point closest to the robot in geodesic distance within the boundary between the explored and unexplored region of the map.

**Navigation Planner.** Given a long-term goal output by the frontier exploration policy, we use the Fast Marching Method [100] as in [98] to plan a path and the first low-level action along this path deterministically. Although the semantic exploration policy acts at a coarse time scale, the planner acts at a fine time scale: every step we update the map and replan the path to the long-term goal. The robot attempts to plan to goals if they have been seen; if it cannot get within a certain distance of the goal objects, then it will instead plan to a point on the frontier.

**Navigating to objects on start\_receptacle.** Since small objects (*e.g.* action\_figure, apple) can be hard to locate from a distance, we leverage the typically larger start\_receptacle goals for finding objects. We make the following changes to the original planning policy [101]:

1. If object and start\_receptacle co-occur in at least one cell of the semantic map, plan to reach the object



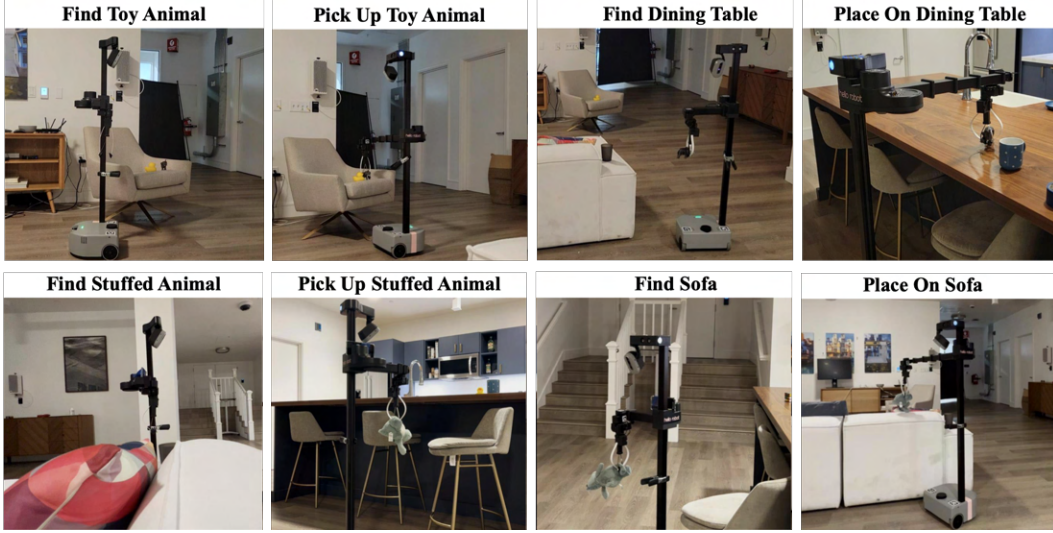

Figure 14: Real-world examples (also see Fig 2). Our system is able to find held-out objects in an unseen environment and navigate to receptacles in order to place them, all with no information about the world at all, other than the relevant classes. However, we see this performance is highly dependent on perception performance for now; many real-world examples also fail due to near-miss collisions.

- 830 2. If the object is not found but `start_receptacle` appears in the semantic map after excluding the regions within 1m of the agent’s past locations, plan to reach the `start_receptacle`
- 831
- 832 3. Otherwise, plan to reach the closest frontier

833 In step 2, we exclude the regions that the agent has been close to, to prevent it from re-visiting already  
834 visited instances of `start_receptacle`.

## 835 D.6 Navigation Limitations

836 We implemented a navigation system that was previously used in extensive real-world experiments [2],  
837 but needed to tune it extensively for it to get close enough to objects to grasp and manipulate them.  
838 The original version by Gervet et al. [2] was focused on finding very large objects from a limited  
839 set of only six classes. Ours supports many more, but as a result, tuning it to both be able to grasp  
840 objects and avoid collisions in all cases is difficult.

841 This is partly because the planner is a discrete planner based on the Fast Marching Method [100],  
842 which cannot take orientation into account and relies on a 5cm discretization of the world. sampling-  
843 based motion planners like RRT-Connect [97], or like that used in the Task and Motion Planning  
844 literature [64, 8], may offer better solutions. Alternately, we could explore optimization-based  
845 planners specifically designed for open-vocabulary navigation planning, as has recently been pro-  
846 posed [12].

847 Our navigation policy relies on accurate pose information from Hector SLAM [96], and unfortunately  
848 does not handle dynamic obstacles. It also models the robot’s location as a cylinder; the Stretch’s  
849 center of rotation is slightly offset from the center of this cylinder, which is not currently accounted  
850 for. Again, sampling-based planners might be better here.

## 851 E Reinforcement Learning Baseline

852 We train four different RL policies: `FindObject`, `FindReceptacle`, `GazeAtObject`, and  
853 `PlaceObject`.

## 854 E.1 Action Space

### 855 E.1.1 Navigation Skills

856 `FindObject` and `FindReceptacle` are, collectively, navigation skills. For these two skills, we use  
857 the discrete action space, as mentioned in Sec. C.4. In our experiments, we found the discrete action  
858 space was better at exploration and easier to train.

### 859 E.1.2 Manipulation Skills

860 For our manipulation skills, we using a continuous action space to give the skills fine grained control.  
861 In the real world, low-level controllers have limits on the distance the robot can move in any particular  
862 step. Thus, in simulation, we limit our base action space by only allowing forward motions between  
863 10-25 cm, or turning by 5-30 degrees in a single step. The head tilt, pan and gripper’s yaw, roll and  
864 pitch can be changed by at most 0.02-0.1 radians in a single step. The arm’s extension and lift can be  
865 changed by at most 2-10cm in a single step. We learn by *teleporting* the base and arm to the target  
866 locations.

## 867 E.2 Observation Space

868 Policies have access to depth from the robot head camera, and semantic segmentation, as well as the  
869 robot’s pose relative to the starting pose (from SLAM in the real world), camera pose, and the robot’s  
870 joint states, including the gripper. RGB image is available to the agent but not used during training.

## 871 E.3 Training Setup

872 All skills are trained using a slack reward of -0.005 per step, incentivizing completion of task using  
873 minimum number of steps. For faster training, we learn our policies using images with a reduced  
874 resolution of 160x120 (compared to Stretch’s original resolution of 640x480).

### 875 E.3.1 Navigation Skills

876 We train `FindObject` and `FindReceptacle` policies for the agent to reach a candidate object or  
877 a candidate target receptacle respectively. The training procedure is the same for both skills. We  
878 pass in the CLIP [14] embedding corresponding with the goal object, as well as segmentation masks  
879 corresponding with the detected target objects. The agent is spawned arbitrarily, but at least 3 meters  
880 from the target, and must move until within 0.1 meters of a goal “viewpoint,” where the object is  
881 visible.

882 **Input observations:** Robot head camera depth, ground-truth semantic segmentation for all receptacle  
883 categories (receptacle segmentation), robot’s pose relative to the starting pose, joint sensor giving  
884 states of camera and arm joints. We implement object-level dropout for the semantic segmentation  
885 mask, where each object has a probability of 0.5 of being left out of the mask. In addition, the input  
886 observation space includes the following:

- 887 • **Goal specification:** For `FindObject`, we pass in the CLIP embedding of the target object  
888 and the start receptacle category. For `FindReceptacle`, we pass in the goal receptacle  
889 category.
- 890 • **Goal segmentation images:** During training, the simulator provides ground truth goal  
891 object segmentation; on the real robot, these are predicted by DETIC [23]. For `FindObject`,  
892 we pass in two channels: one showing all instances of candidate objects, one showing all  
893 instances of candidate start receptacles. For `FindReceptacle`, we pass a single channel  
894 showing all instances of candidate goal receptacles. We implement a similar object-level  
895 dropout procedure here as we did for the receptacle segmentation.

896 **Initial state:** The agent is spawned at least 3m away from candidate object or receptacle. It starts in  
897 “navigation mode,” with the robot’s head facing forward.



898 **Actions:** The policy predicts translation and rotation waypoints, as well as a discrete stop action.

899 **Success condition:** The agent should call the discrete stop action when it reaches within 0.5m of a  
900 goal view point. The agent should be facing the target: the angle between agent’s heading direction  
901 and the ray from robot to center of the closest candidate object should be no more than 15 degrees.

**Reward:** Assume at time step  $t$ , the geodesic distance to the closest goal is given by  $d(t)$ , the angle between agent’s heading direction and the ray from agent to closest goal is given by  $\theta(t)$ , and  $\text{did\_collide}(t)$  indicates if the action the agent took at time  $t - 1$  resulted in a collision at time  $t$ . The training reward is given by:

$$R_{\text{IndX}}(t) = \alpha[d(t-1) - d(t)] + \beta \mathbb{1}[d(t) \leq D_{\text{close}}][\theta(t-1) - \theta(t)] + \gamma \mathbb{1}[\text{did\_collide}(t)]$$

902 with  $\alpha = 1$ ,  $\beta = 1$ ,  $\gamma = 0.3$  and  $D_{\text{close}} = 3$ .

903

### 904 E.3.2 GazeAtObject

905 The GazeAtObject skill starts near the object, and provides some final refinement steps until the  
906 agent is close enough to call a grasp action, i.e. it is in arm’s length of the object and the object is  
907 centered and visible. The agent needs to move closer to the object and then adjust its head tilt until  
908 the candidate object is close and centered. It makes predictions to move and rotate the head, as well  
909 as to center the object and make sure it’s within arm’s length, so that the discrete grasping policy can  
910 execute.

911 The GazeAtObject skill is supposed to start off from locations and help reach a location within  
912 arm’s length of a candidate object. This is trained by first initialising the agents close to candidate  
913 start receptacles. The agent is then tasked to reach close to the agent and adjust its head tilt such that  
914 the candidate object is close and centered in the agent’s camera view. We next provide details on the  
915 training setup.

916 **Input observations:** Ground truth semantic segmentation of candidates objects, head depth sensor,  
917 joint sensor giving all head and arm joint states, sensor indicating if the agent is holding any object,  
918 clip embedding for the target object name.

919 **Initial state:** The robot again starts in “navigation mode,” with its arm retracted, with the gripper  
920 facing downwards, and with the head/camera facing the base, base at an angle of 5 degrees of the  
921 center object and on one of the “viewpoint” locations pre-computed during episode generation. The  
922 object will therefore be assumed to be visible.

923 **Actions:** This policy predicts base translation and rotation waypoints, camera tilt, as well as a discrete  
924 “grasp” action.

925 **Success condition:** The center pixel on the camera should correspond to a valid candidate object and  
926 the agent’s base should be within 0.8m from the object.

927 **Reward:** We train the gaze-policy mainly with a dense reward based on distance to goal. Specifically,  
928 assuming the distance of the end-effector to the closest candidate goal at time  $t$  is  $d(t)$  (in metres),  
929 the agent receives a reward proportional to  $d(t-1) - d(t)$ . Further, when the agent reaches with  
930 0.8m, we provide an additional reward for incentivizing the agent to look towards the object.

931 Let  $\theta(t)$  denote the angle (in radians) between the ray from agent’s camera to the object and camera’s  
932 normal. Then the reward is given as:

$$R_{\text{Gaze}}(t) = \alpha[d(t-1) - d(t)] + \beta \mathbb{1}[d(t) \leq \gamma] \cos(\theta(t))$$

933 with  $\alpha = 2$ ,  $\beta = 1$  and  $\gamma = 0.8$  in our case.

934 The agent receives an additional positive reward of 2 once the episode succeeds and receives a  
935 negative reward of  $-0.5$  for centering its camera towards a wrong object.

| Nav.      | Manip.    | Perception   | FindObj | Gaze | FindRec | Place | Total |
|-----------|-----------|--------------|---------|------|---------|-------|-------|
| Heuristic | Heuristic | Ground Truth | 485.3   | -    | 95.9    | 8.5   | 574.1 |
| Heuristic | RL        | Ground Truth | 483.5   | 7.7  | 101.9   | 67.2  | 611.6 |
| RL        | Heuristic | Ground Truth | 313.4   | -    | 136.9   | 7.7   | 437.6 |
| RL        | RL        | Ground Truth | 327.6   | 9.1  | 130.0   | 47.8  | 433.6 |
| Heuristic | Heuristic | DETIC [23]   | 405.9   | -    | 48.9    | 6.8   | 459.0 |
| Heuristic | RL        | DETIC [23]   | 412.8   | 44.7 | 47.5    | 242.2 | 584.2 |
| RL        | Heuristic | DETIC [23]   | 504.3   | -    | 128.4   | 7.3   | 586.2 |
| RL        | RL        | DETIC [23]   | 496.3   | 45.9 | 139.0   | 156.4 | 583.3 |

Table 5: The number of steps that the agent takes performing each of the skills for different baselines. Note that here we only consider the cases where the skill terminates. The last column gives the total number of steps the agent takes on average for executing the four skills.

### E.3.3 PlaceObject

Finally, the robot must move its arm in order to place the object on a free spot in the world. In this case, it starts at a viewpoint near a `goal_receptacle`. It must move up to the object and open its gripper in order to place the object on this surface.

**Input observations:** Ground truth segmentation of goal receptacles, head depth sensor, joint sensor, sensor indicating if the agent is holding any object, CLIP [14] embedding for the name of object being held.

**Initial configuration:** Arm retracted, with gripper down and holding onto an object, head facing the base. The agent is spawned on a viewpoint with its base facing the object with an error of at most 15 degrees.

**Actions:** Base translation and rotation waypoints, all arm joints (arm extension, arm lift, gripper yaw, pitch and roll), a manipulation mode action that can be invoked only once in an episode to turn the agent’s head towards the arm and rotate the base left by 90 degrees. The agent is not allowed to move its base while in manipulation mode.

**Success condition:** The episode succeeds if the agent releases the object and the object stays on the receptacle for 50 timesteps.

**Reward:** The agent receives a positive sparse reward of 5 when it releases the object and the object comes in contact with a target receptacle. Additionally, we provide a positive reward of 1 for each step the object stays in contact with the target receptacle. It receives a negative reward of  $-1$  if the agent releases the object but the object does not come in contact with the receptacle.

## F Additional Analysis

Here, we provide some additional analysis of the different skills we trained to complete the Open-Vocabulary Mobile Manipulation task.

### F.1 Number of steps taken in each stage by different baselines

Table 5 shows the number of steps taken by each skill in our baseline. With DETIC perception, we observed that the RL skills explored less efficiently than our simple heuristic-based planner; this translates to far fewer steps taken in successful episodes, although because RL exploration essentially “gives up” if an object isn’t nearby, it can take lots of steps in many situations. In the real world, we saw similar behavior - sometimes, the RL policies would not explore enough to be able to find a goal at all.

Next, we observe that the Gaze and Place policies, which were trained with ground truth perception, take significantly longer to terminate with DETIC perception.

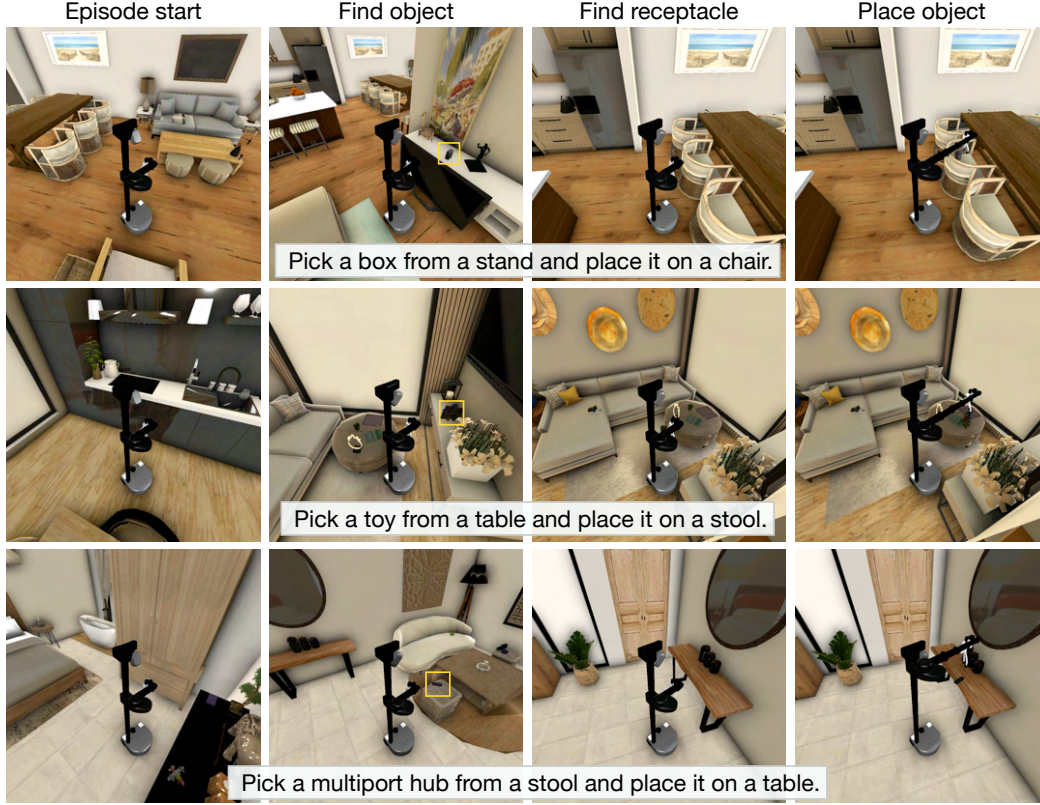

Figure 15: We show multiple executions of the Open-Vocabulary Mobile Manipulation task in a variety of simulated environments.

| Nav.      | Manip.    | Perception   | FindObj | Gaze | Pick | FindRec | Place | Place terminates |
|-----------|-----------|--------------|---------|------|------|---------|-------|------------------|
| Heuristic | Heuristic | Ground Truth | 100.0   | -    | 55.2 | 55.2    | 48.9  | 48.8             |
| Heuristic | RL        | Ground Truth | 100.0   | 54.7 | 53.7 | 53.7    | 46.7  | 36.3             |
| RL        | Heuristic | Ground Truth | 100.0   | -    | 80.6 | 80.6    | 71.2  | 71.1             |
| RL        | RL        | Ground Truth | 100.0   | 79.5 | 68.1 | 68.1    | 60.2  | 48.2             |
| Heuristic | Heuristic | DETIC [23]   | 100.0   | -    | 31.8 | 31.8    | 27.8  | 27.8             |
| Heuristic | RL        | DETIC [23]   | 100.0   | 32.3 | 17.6 | 17.6    | 15.5  | 4.3              |
| RL        | Heuristic | DETIC [23]   | 100.0   | -    | 50.2 | 50.2    | 37.3  | 37.2             |
| RL        | RL        | DETIC [23]   | 100.0   | 50.1 | 24.8 | 24.8    | 19.8  | 8.5              |

Table 6: We report the percentage of times each skill gets invoked for each of the different baselines. The last column gives the percentage of times the agent finishes executing all skills.

968 Finally, in Table 6, we look at the percentage of times the agent attempts each of the different skills.  
 969 We find that the RL trained FindObj skill terminates more often than the heuristic FindObj skill and  
 970 episodes terminate less frequently with DETIC perception when compared to GT perception.

## 971 F.2 Performance on Seen vs. Unseen Object Categories

972 Table 7 shows results broken down by seen vs. unseen instances, and seen vs. unseen categories.  
 973 Specifically we look at these two pools of objects from the validation set:

- 974 • **SC,UI**: Seen category, unseen instance. An object of a class that appeared in the training  
 975 data (e.g., “cup”), but not a specific “cup” that appeared in the training data.

| Nav.      | Manip.    | Perception   | FindObj Success. |       |      | PickObj Success. |       |       | FindRec Success |       |      | Overall Success |       |      |
|-----------|-----------|--------------|------------------|-------|------|------------------|-------|-------|-----------------|-------|------|-----------------|-------|------|
|           |           |              | SC,UI            | UC,UI | All  | SC,UI            | UC,UI | Total | SC,UI           | UC,UI | All  | SC,UI           | UC,UI | All  |
| Heuristic | Heuristic | DETIC [23]   | 23.6             | 22.6  | 23.3 | 11.7             | 11.1  | 11.5  | 2.9             | 3.2   | 3.0  | 0.2             | 0.5   | 0.3  |
| Heuristic | Heuristic | Ground Truth | 47.9             | 42.3  | 46.2 | 40.3             | 38.0  | 39.5  | 18.2            | 19.7  | 18.6 | 7.3             | 5.9   | 6.9  |
| RL        | Heuristic | DETIC [23]   | 20.2             | 19.1  | 19.9 | 10.5             | 10.0  | 10.2  | 4.7             | 3.8   | 4.4  | 1.0             | 0.3   | 0.8  |
| RL        | Heuristic | Ground Truth | 54.6             | 56.1  | 55.1 | 42.5             | 40.7  | 41.9  | 25.9            | 27.2  | 26.4 | 6.4             | 6.7   | 6.5  |
| Heuristic | RL        | DETIC [23]   | 25.5             | 22.9  | 24.8 | 10.0             | 8.4   | 9.5   | 5.4             | 4.3   | 5.0  | 0.6             | 0.8   | 0.7  |
| Heuristic | RL        | Ground Truth | 47.9             | 45.3  | 47.2 | 42.0             | 41.0  | 41.7  | 26.5            | 28.6  | 27.1 | 19.7            | 19.7  | 19.7 |
| RL        | RL        | DETIC [23]   | 20.0             | 19.1  | 19.8 | 12.2             | 11.1  | 11.8  | 7.1             | 4.9   | 6.3  | 1.7             | 1.1   | 1.5  |
| RL        | RL        | Ground Truth | 55.5             | 55.8  | 55.7 | 50.5             | 49.3  | 50.2  | 35.6            | 34.2  | 35.2 | 22.3            | 17.8  | 21.0 |

Table 7: Performance breakdown by seen and unseen categories, and compared to overall performance. In our baselines, we relied heavily on a pretrained object detector for generalization, so we don’t see a dramatic difference in performance between seen and unseen objects.

976 • **UC,UI:** Unseen instance of an unseen category; an object of a type that did not appear in  
977 the training data at all.

978 In general, because we are relying on DETIC and not training our own semantic perception for this  
979 baseline, we do not see a large difference between the two categories of object.

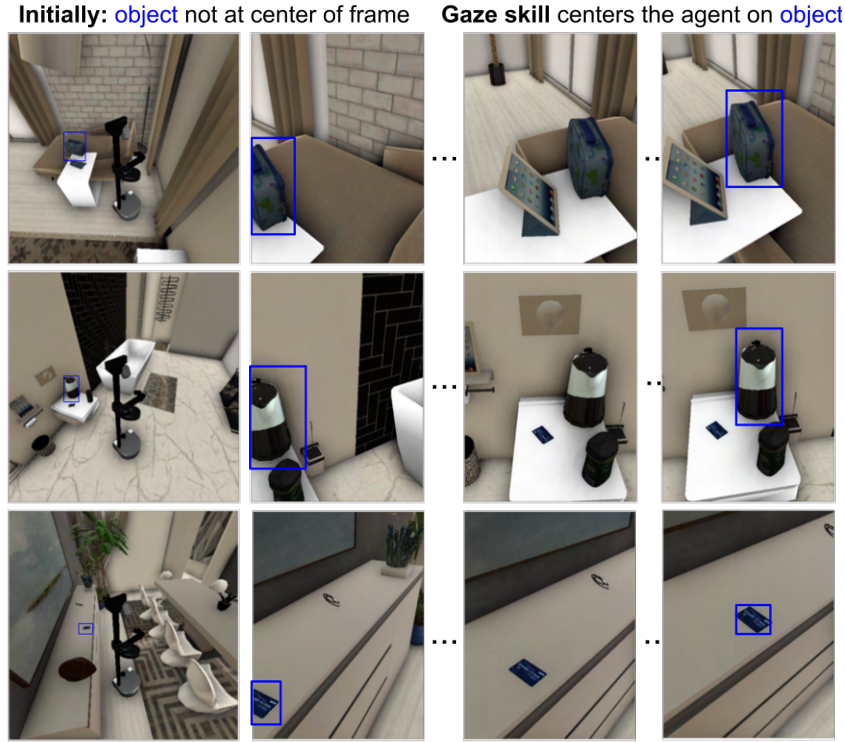

Figure 16: RL Gaze skill in action: The agent is allowed to move its base and change its camera tilt to get closer to object and bring object at the center of its camera frame

### 980 F.2.1 Example DETIC [23] predictions

981 In Table 5, we observe that Gaze policy takes significantly longer time to terminate with DETIC [23]  
982 perception. The gaze policy (see Fig. 16) tries to center the agent on the object of interest by allowing  
983 the agent to move its base and camera tilt. For this, it relies on DETIC’s ability to detect novel objects.  
984 Now, we visualize DETIC segmentations of agent’s egocentric observations by placing agent at the  
985 points where the Gaze skill is expected to start: the object’s viewpoints. We observe that while  
986 DETIC is able to detect a few objects present in the image, it fails at consistently detecting all the  
987 objects present in the egocentric frame.



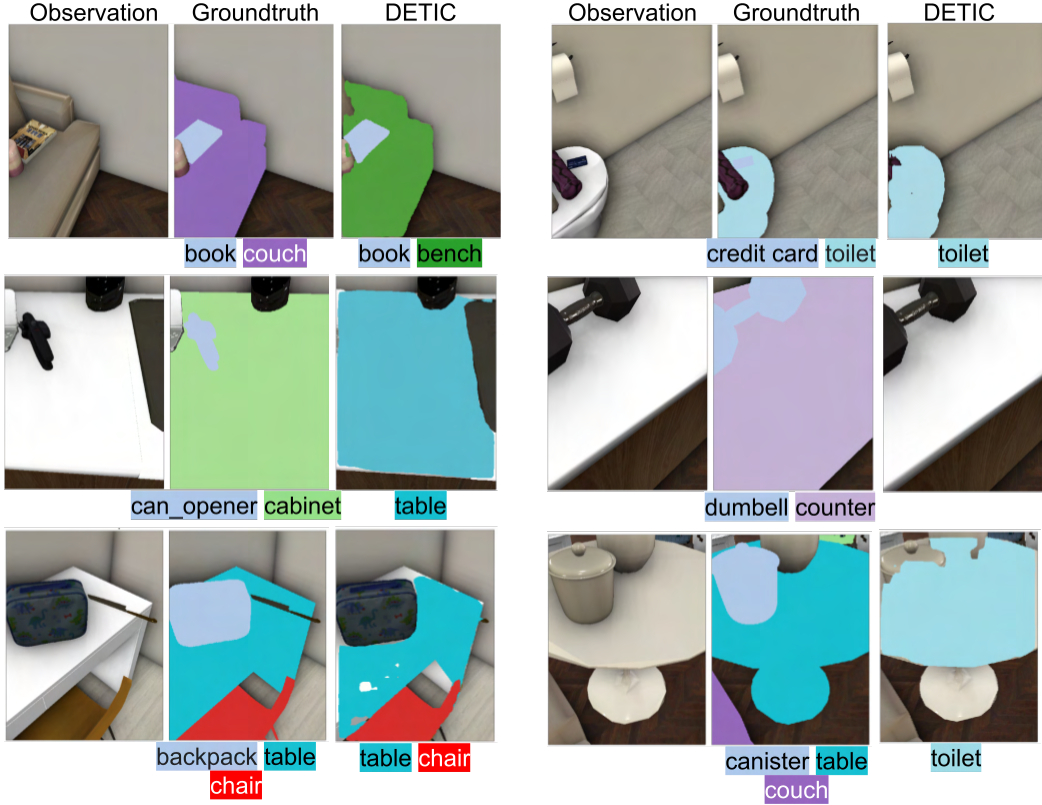

Figure 17: Visualization of groundtruth and DETIC [23] segmentation masks for agent’s egocentric RGB observations. Note that we use a DETIC vocabulary consisting of the fixed list of receptacle categories and target objectname. We observed that DETIC often fails to accurately detect all the objects present in the given frame.

| Name                         | Mobile | Human<br>Sized | Safe | Commercially<br>Available | Manipulation<br>DOF | Approximate<br>Cost |
|------------------------------|--------|----------------|------|---------------------------|---------------------|---------------------|
| Boston Dynamics Spot         | ✓      | ✗              | ✗    | ✓                         | 7                   | \$200,000           |
| Franka Emika Panda           | ✗      | ✗              | ✓    | ✓                         | 7                   | \$30,000            |
| Locobot                      | ✓      | ✗              | ✓    | ✗                         | 5                   | \$5,000             |
| Fetch                        | ✓      | ✓              | ✓    | ✗                         | 7                   | \$100,000           |
| Hello Robot Stretch          | ✓      | ✓              | ✓    | ✓                         | 4                   | \$19,000            |
| <b>Stretch with DexWrist</b> | ✓      | ✓              | ✓    | ✓                         | 6                   | \$25,000            |

Table 8: Notes on platform selection. We chose the **Stretch with DexWrist** as a good compromise between manipulation, navigation, and cost, while being human-safe and approximately human-sized.

## 988 G Hardware Setup

989 Here, we will discuss choices related to the real-world hardware setup in extra detail along with  
990 information about the tools that we use for the visualization on the robot.

### 991 G.1 Hardware Choice

992 We describe some options for commercially-available robotics hardware in Tab. 8. While the Franka  
993 Emika Panda is not a mobile robot, we include it here because it’s a very commonly used platform  
994 in both industrial research labs and at universities, making its price a fair comparison point for what  
995 is reasonable.

## 996 G.2 Visualizing The Robot

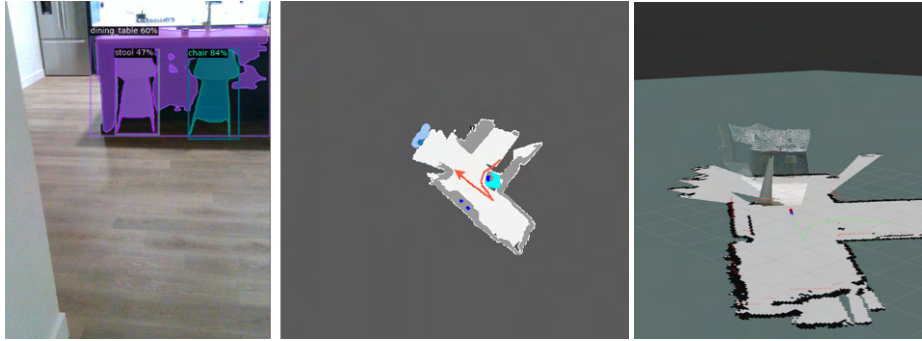

Figure 18: Exploring a real-world apartment during testing. The robot uses Detic [23] to perceive the world and update a 2D map (center) which captures where it’s seen relevant classes, and which obstacles exist; detections aren’t always reliable, especially given a large and changing vocabulary of objects that we care about. In the HomeRobot stack, we provide a variety of tools for visualizing and implementing policies, including integration of RVIZ (right).

997 We use RVIZ, a part of ROS, to visualize results and progress. Fig. 18 shows three different outputs  
998 from our system: on the far left, an image from the test environment being processed by Detic; in the  
999 center, a top-down map generated by the navigation planner described in Sec. D.2; and on the right,  
1000 an image from RVIZ with the point cloud from the robot’s head camera registered against the 2D  
1001 lidar map created by Hector SLAM.

1002 One advantage of the HomeRobot stack is that it is designed to work with existing debugging tools -  
1003 especially ROS [102]. ROS is a widely-used framework for robotics software development which  
1004 comes with a lot of online resources, official support from Hello Robot, and a rich and thriving  
1005 open-source community with wide industry backing.

1006
